# Supplementary material for: The reaction of acetaldehyde, glyoxal, and ammonia to yield 2-methylimidazole: thermodynamic and kinetic analyses of the mechanism
Source: Royal Society of Chemistry journal article supplement (doi:10.1039/d2cp00135g), 2022-01-01
Supplement: d2cp00135g1.pdf [file d2cp00135g1.pdf]

## Supplementary Information

### **The Reaction of Acetaldehyde, Glyoxal, and Ammonia to Yield 2-Methylimidazole: Thermodynamic and Kinetic Analyses of the Mechanism**

Vera P. Tuguldurova, Olga V. Vodyankina and Alexander V. Fateev

Schemes for the 2-methylimidazole formation  
Scheme A

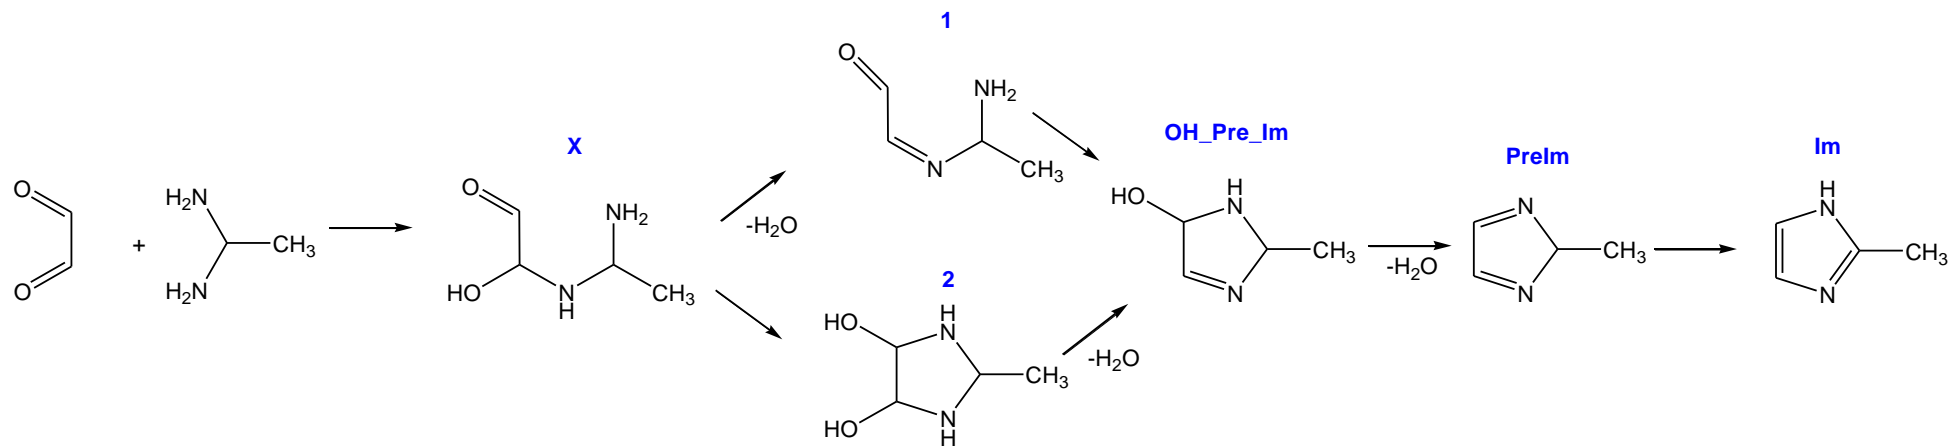

Scheme B

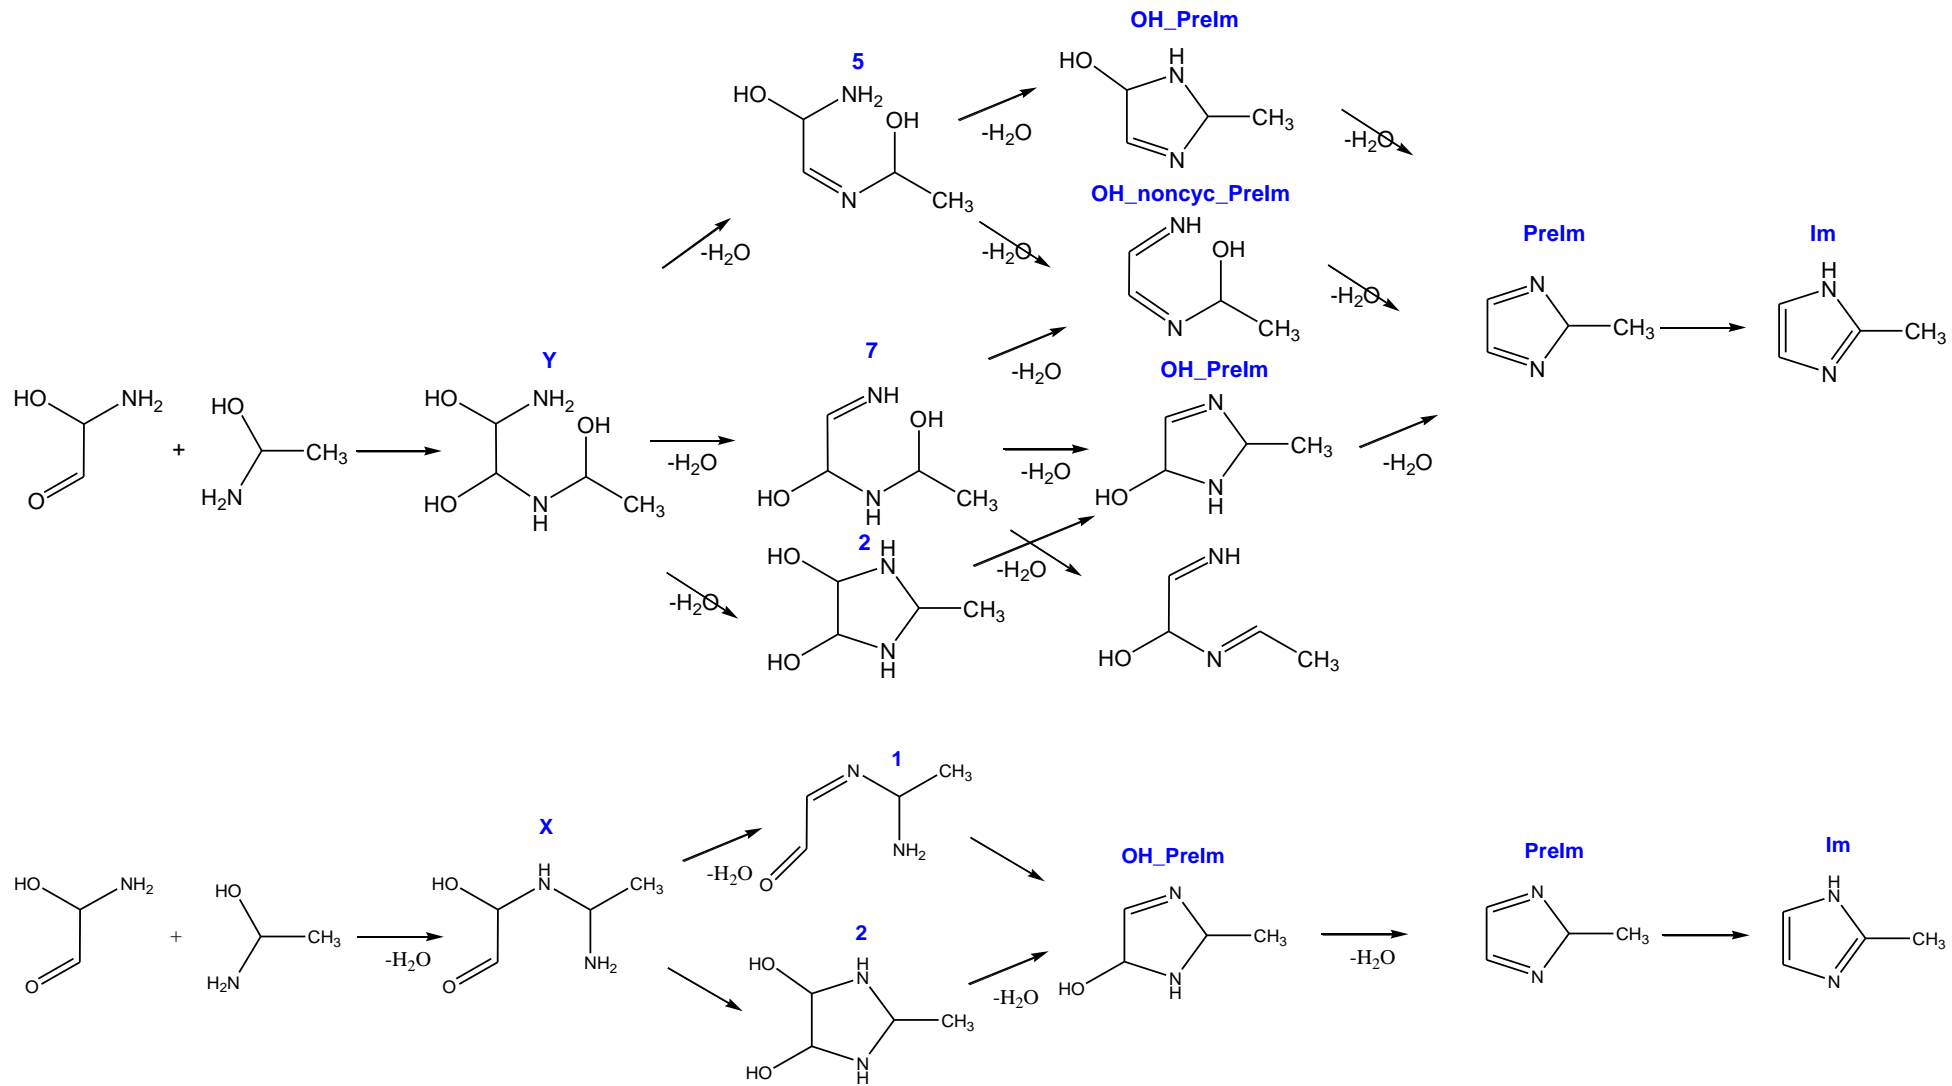

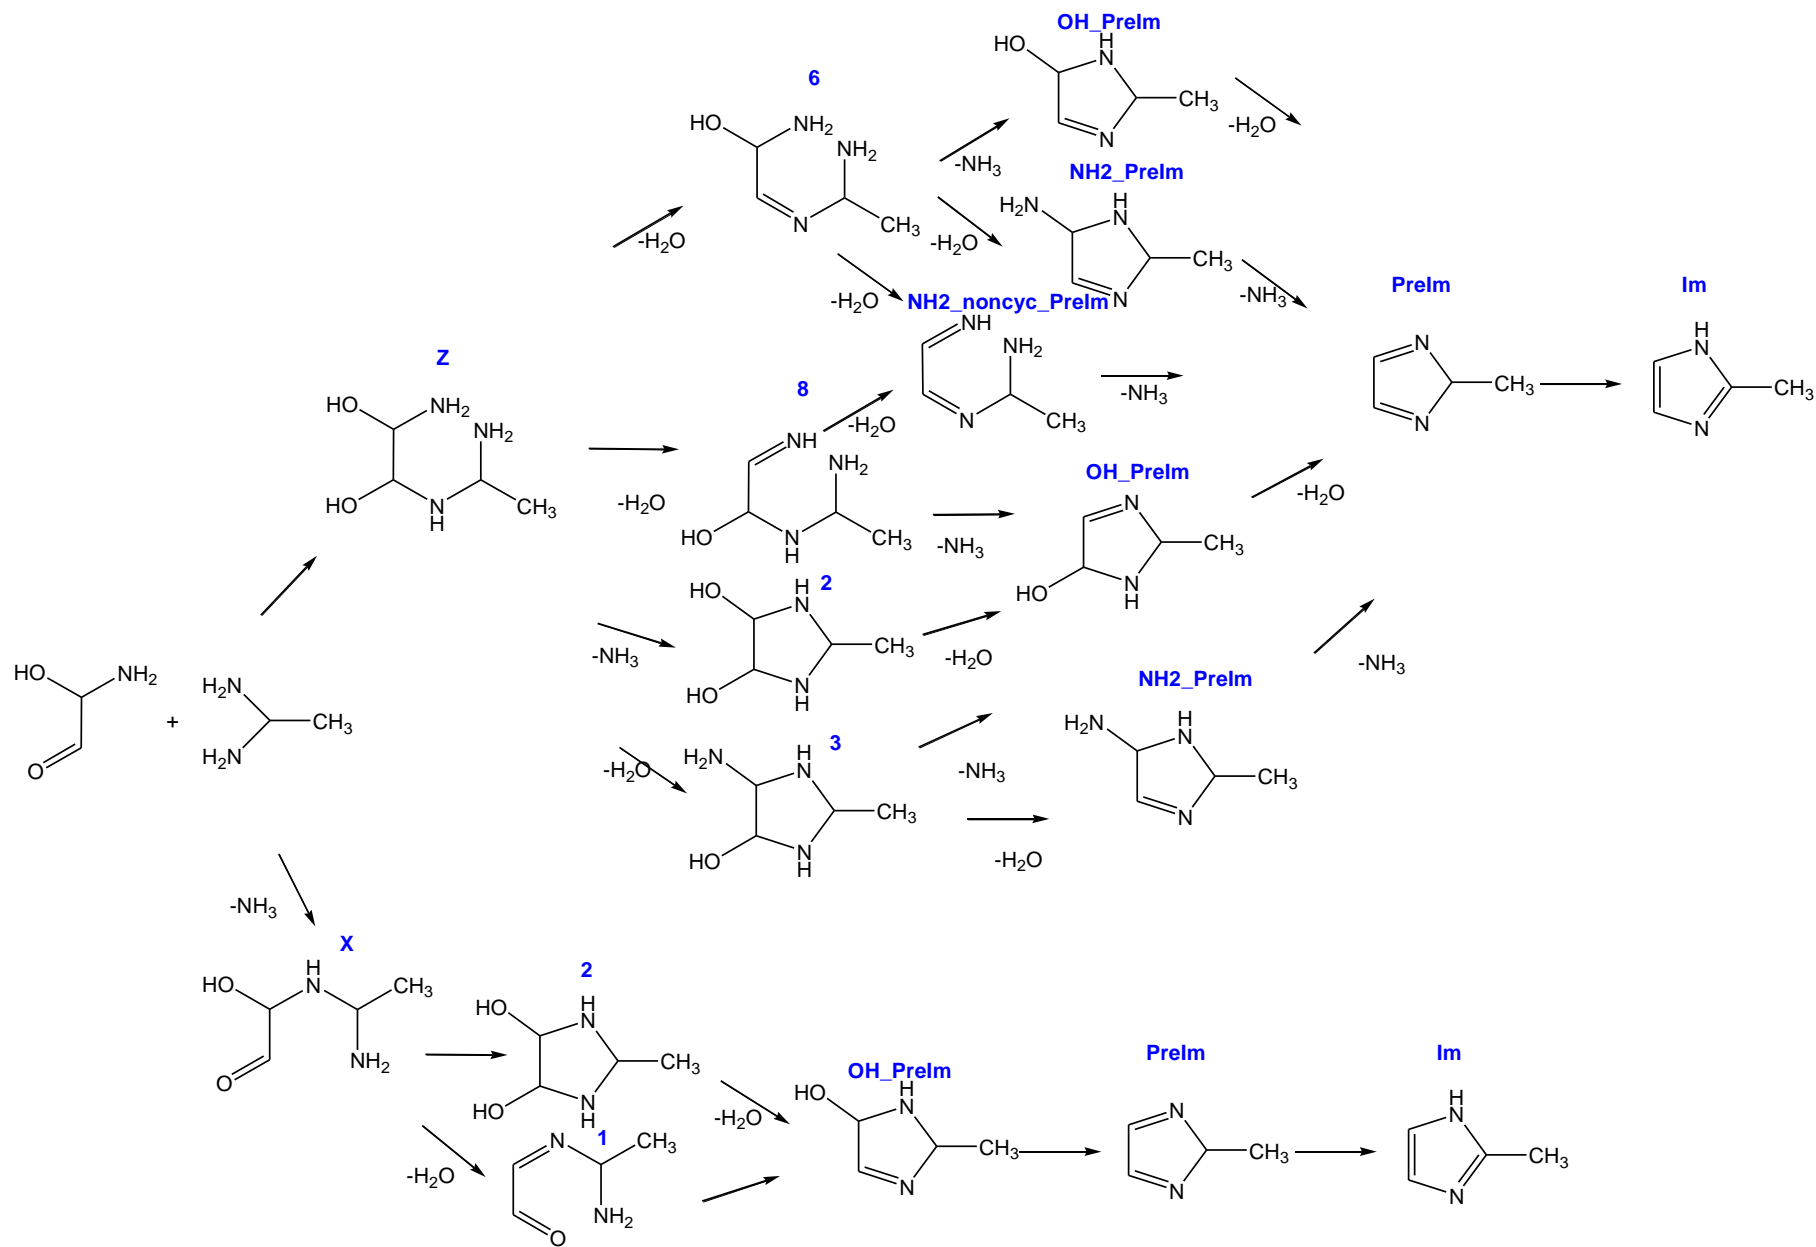

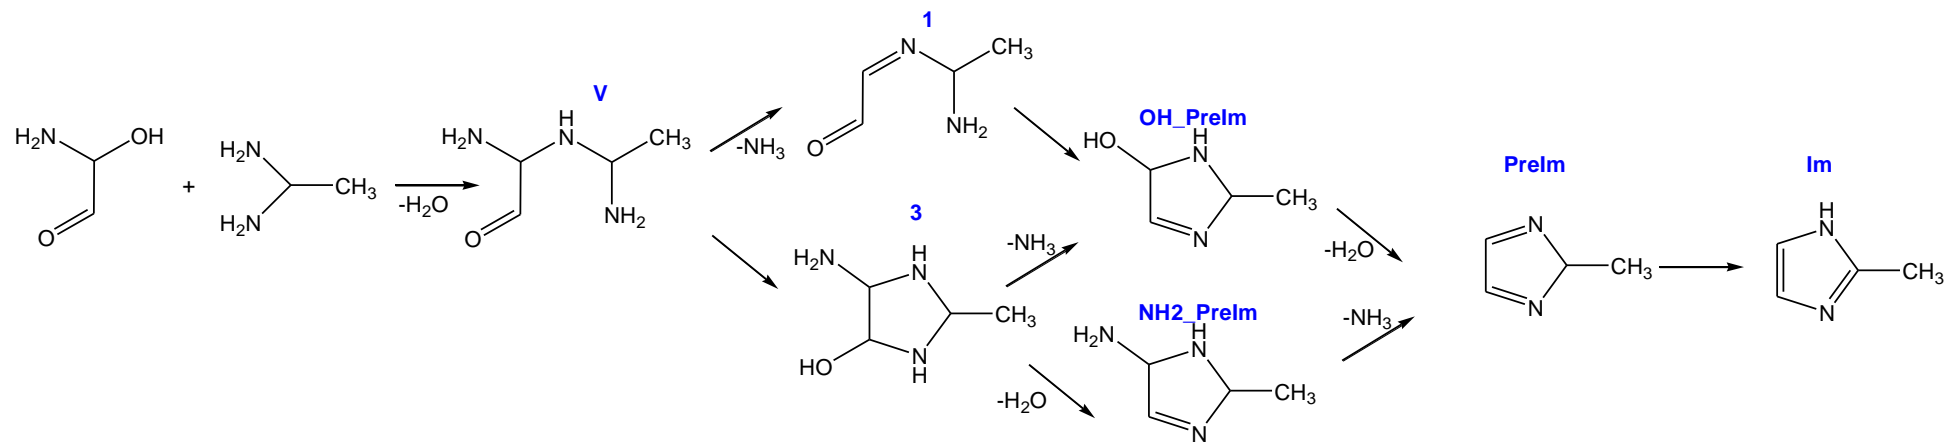

Scheme C

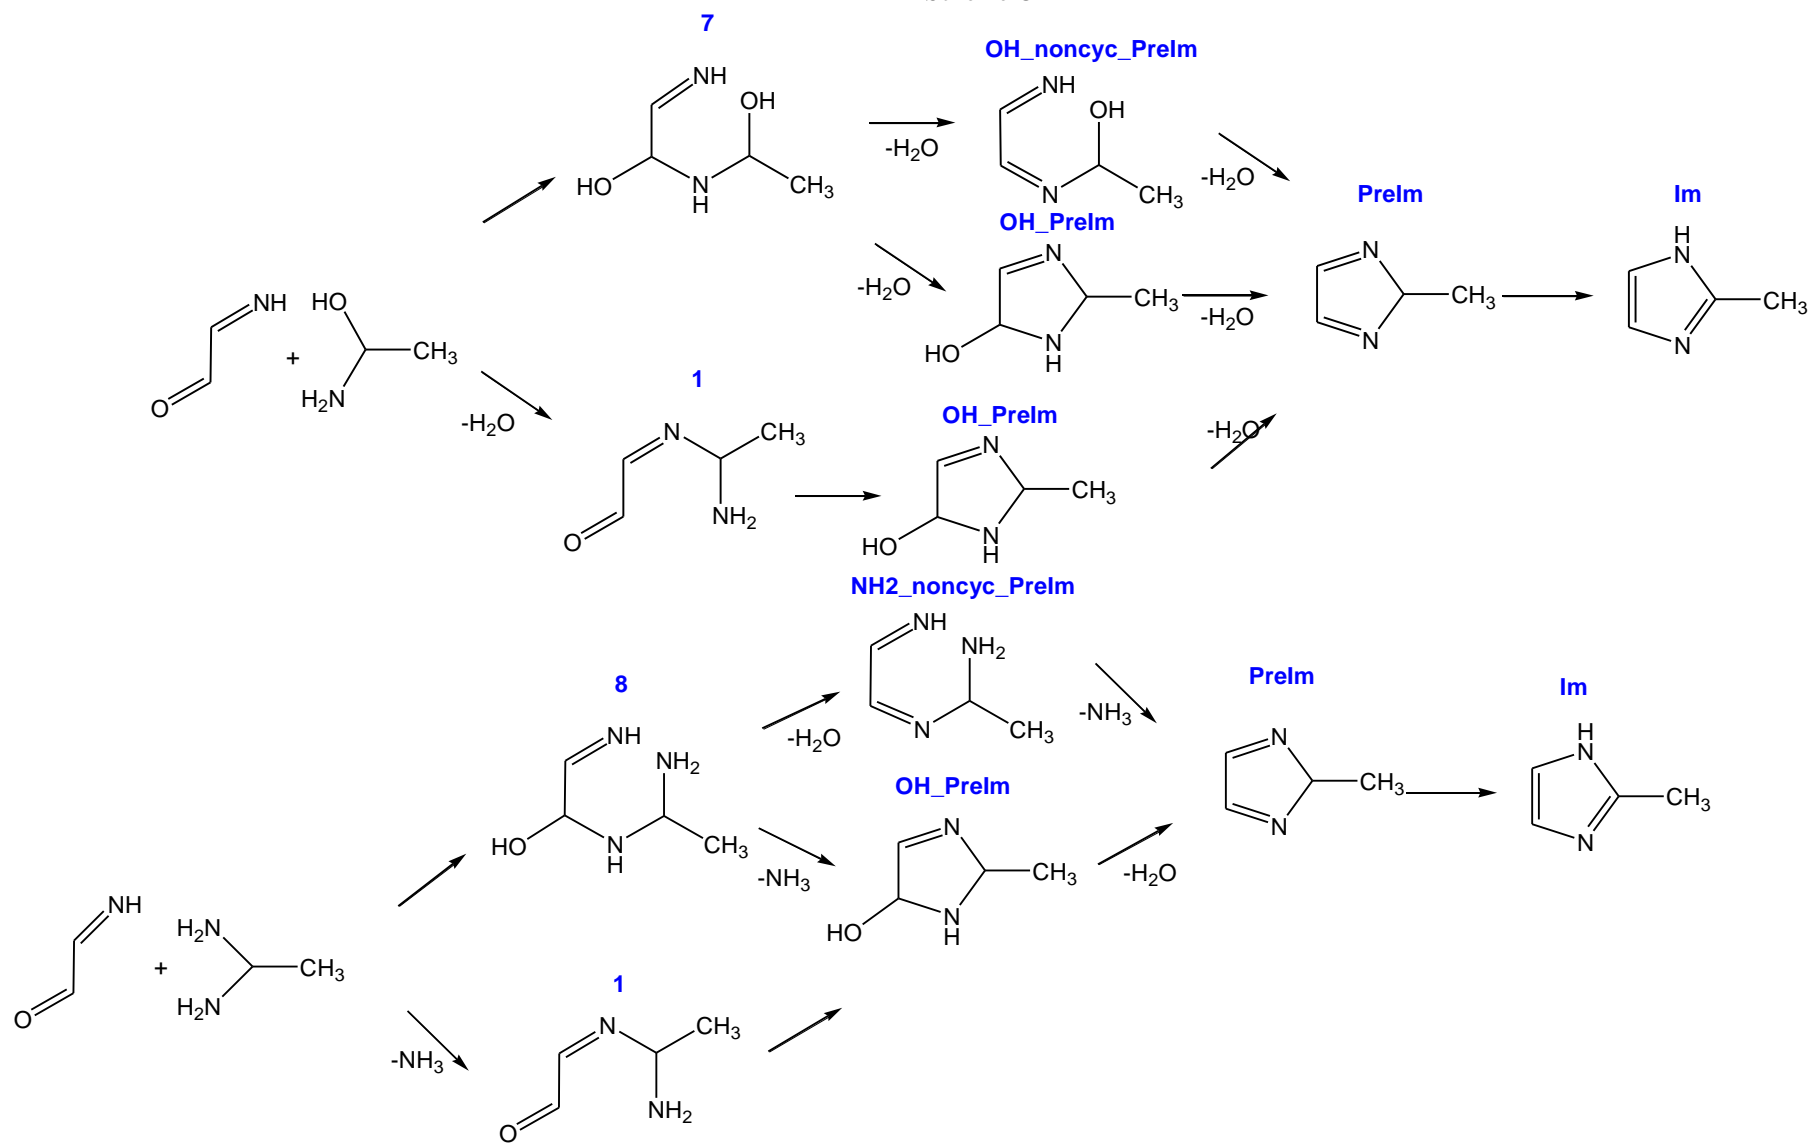

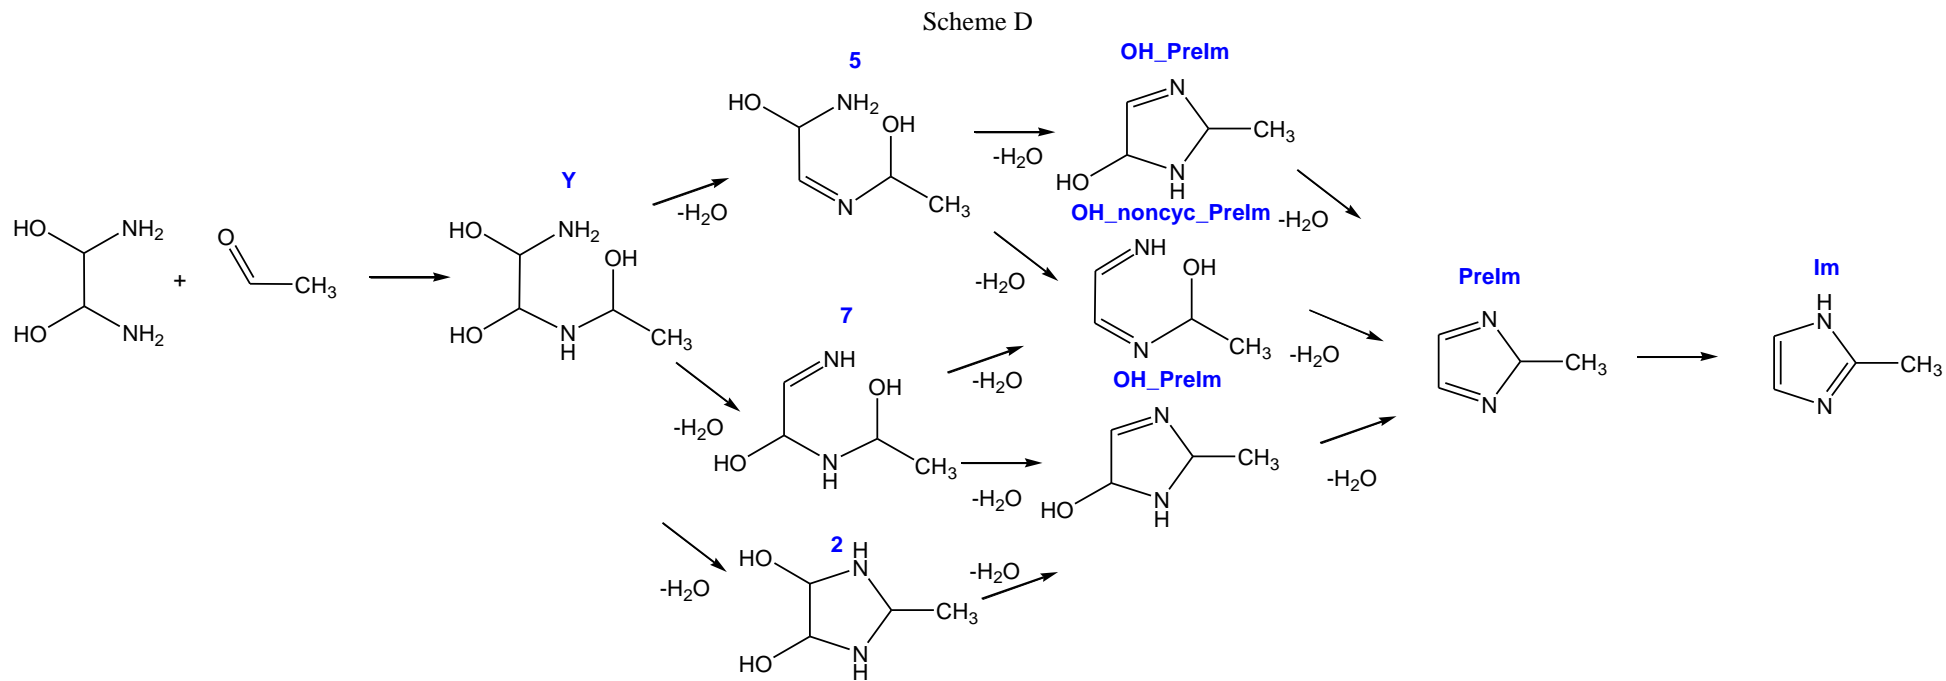

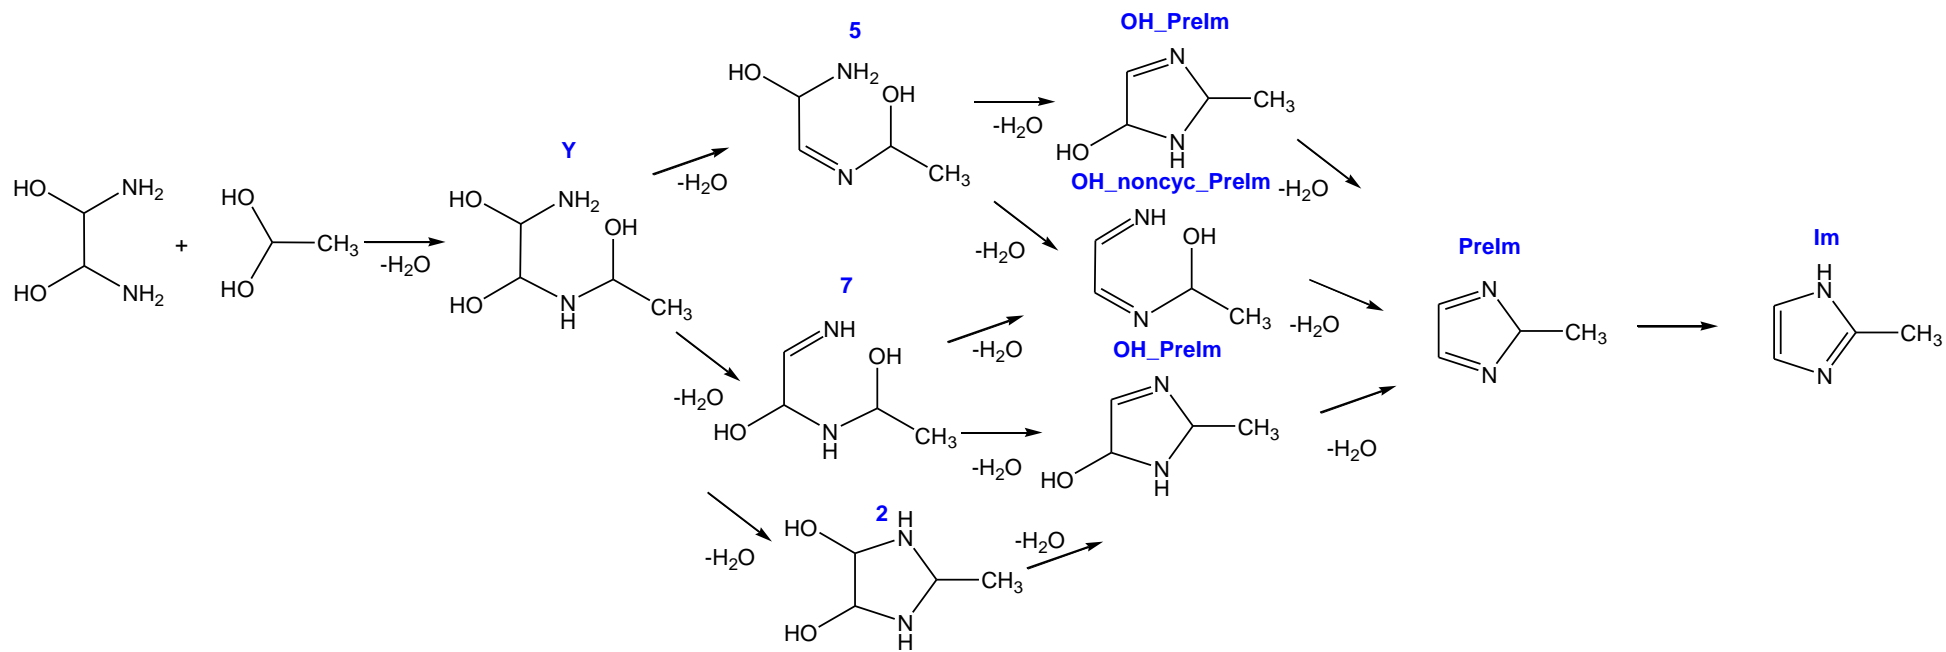



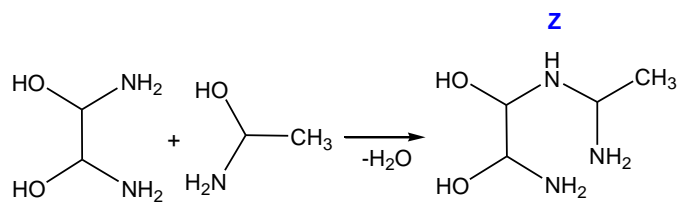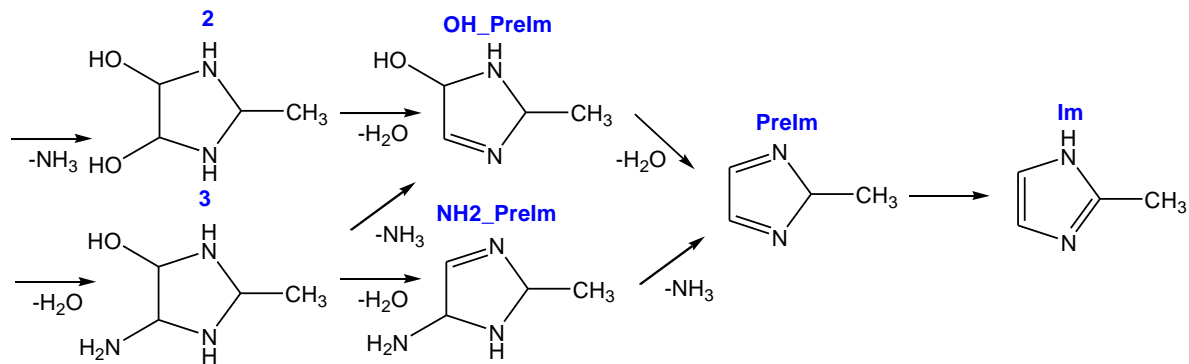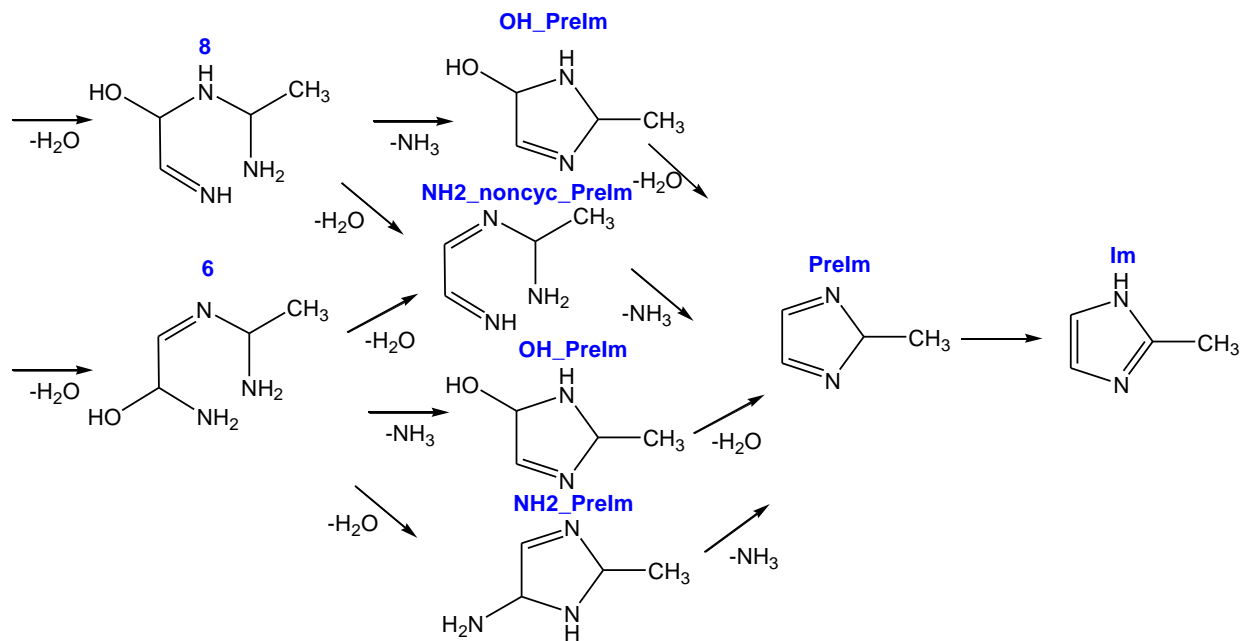



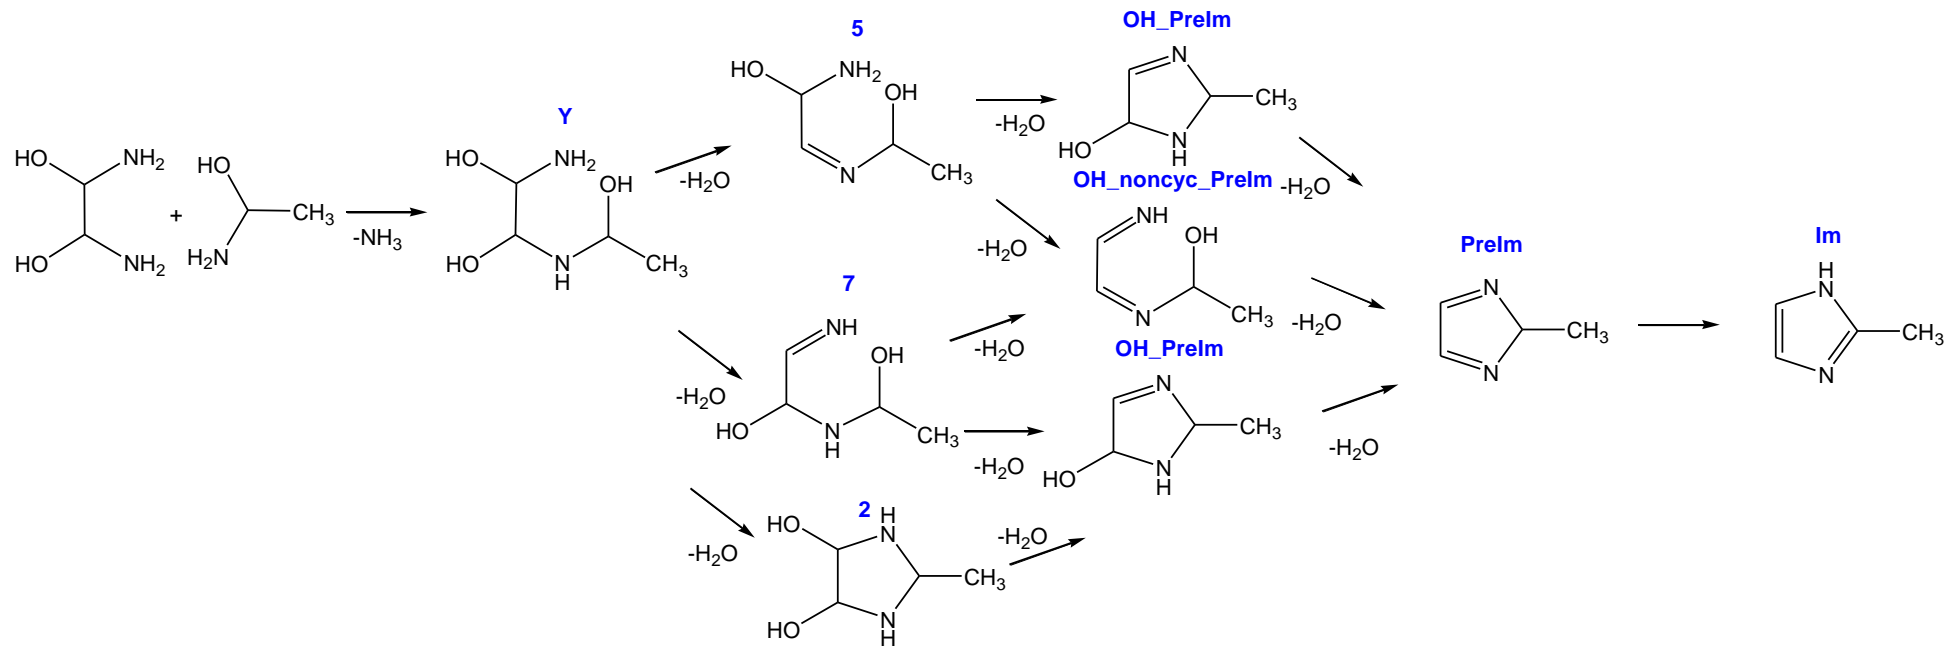



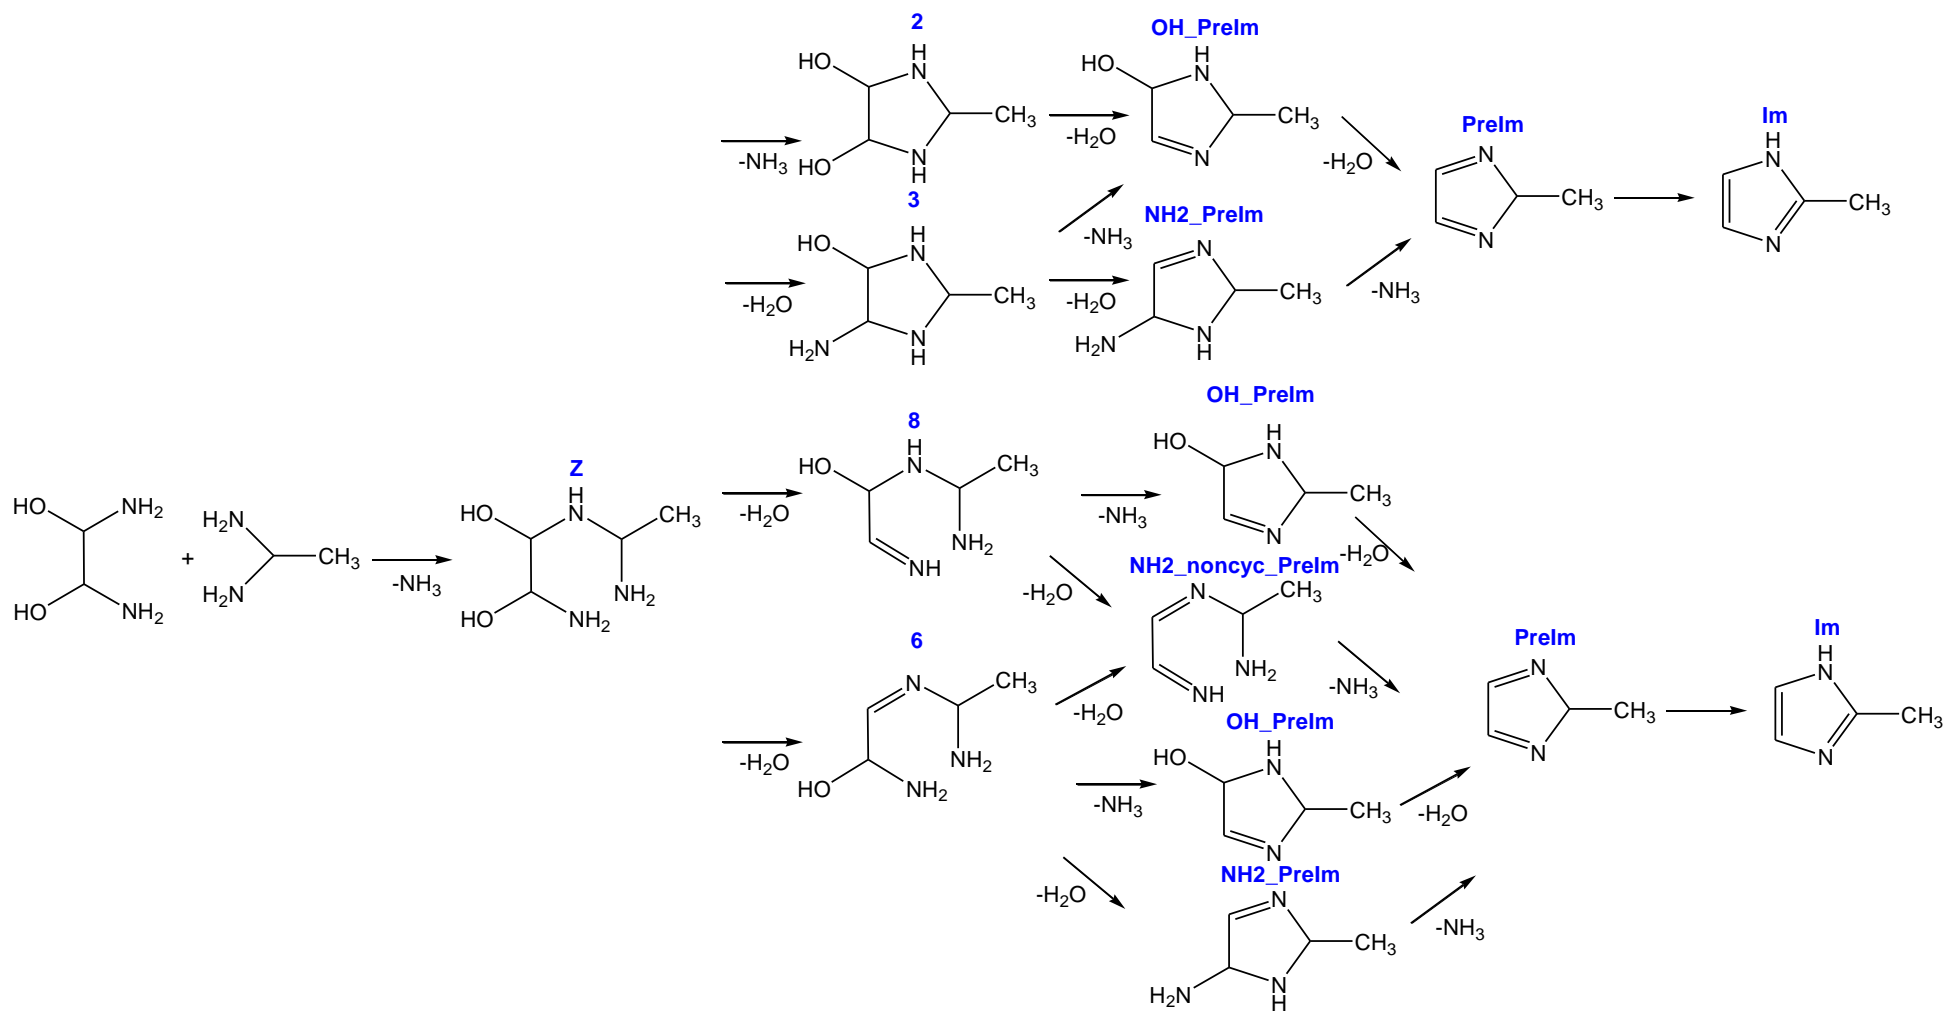

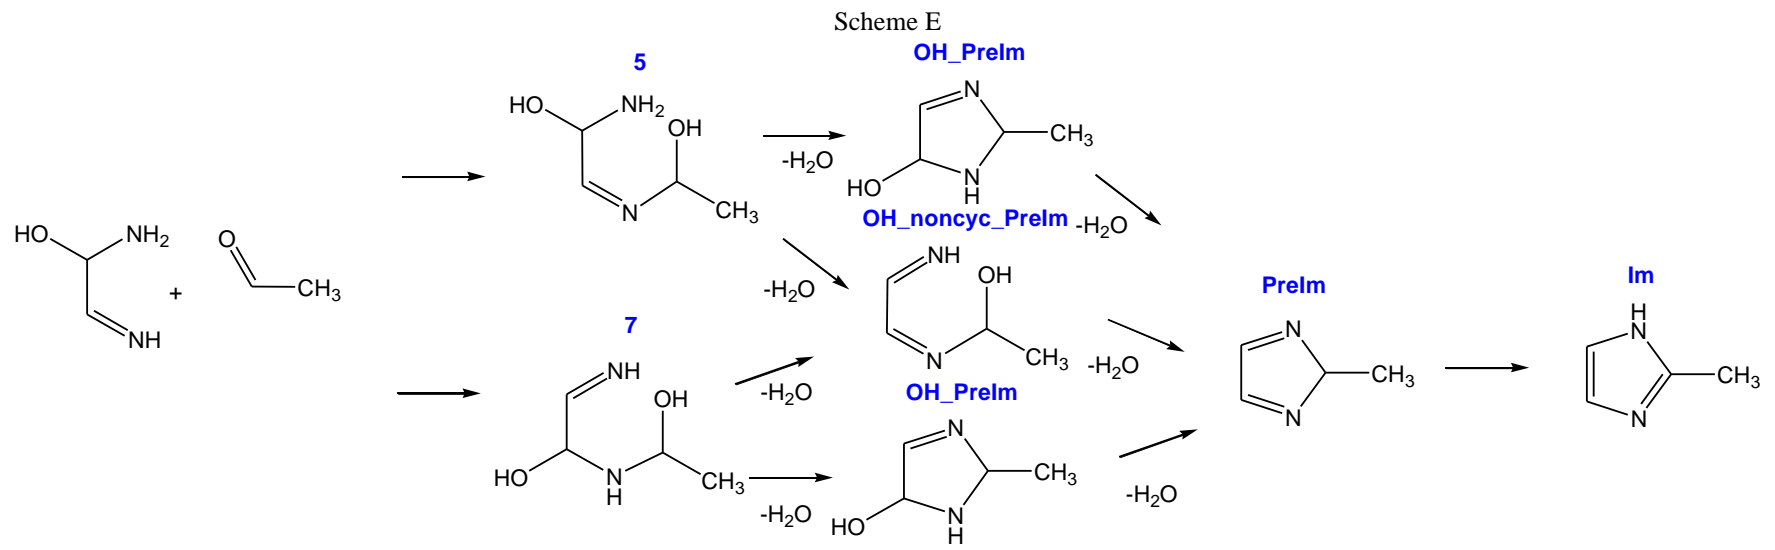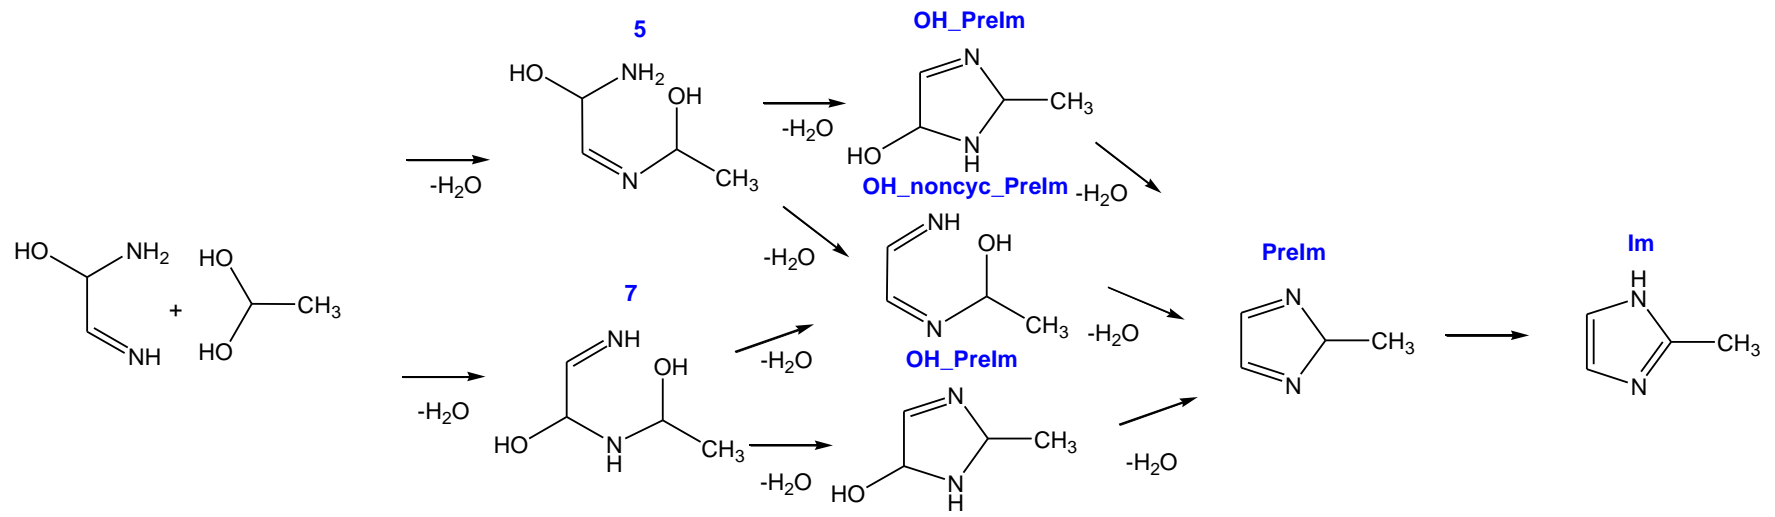

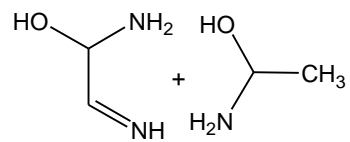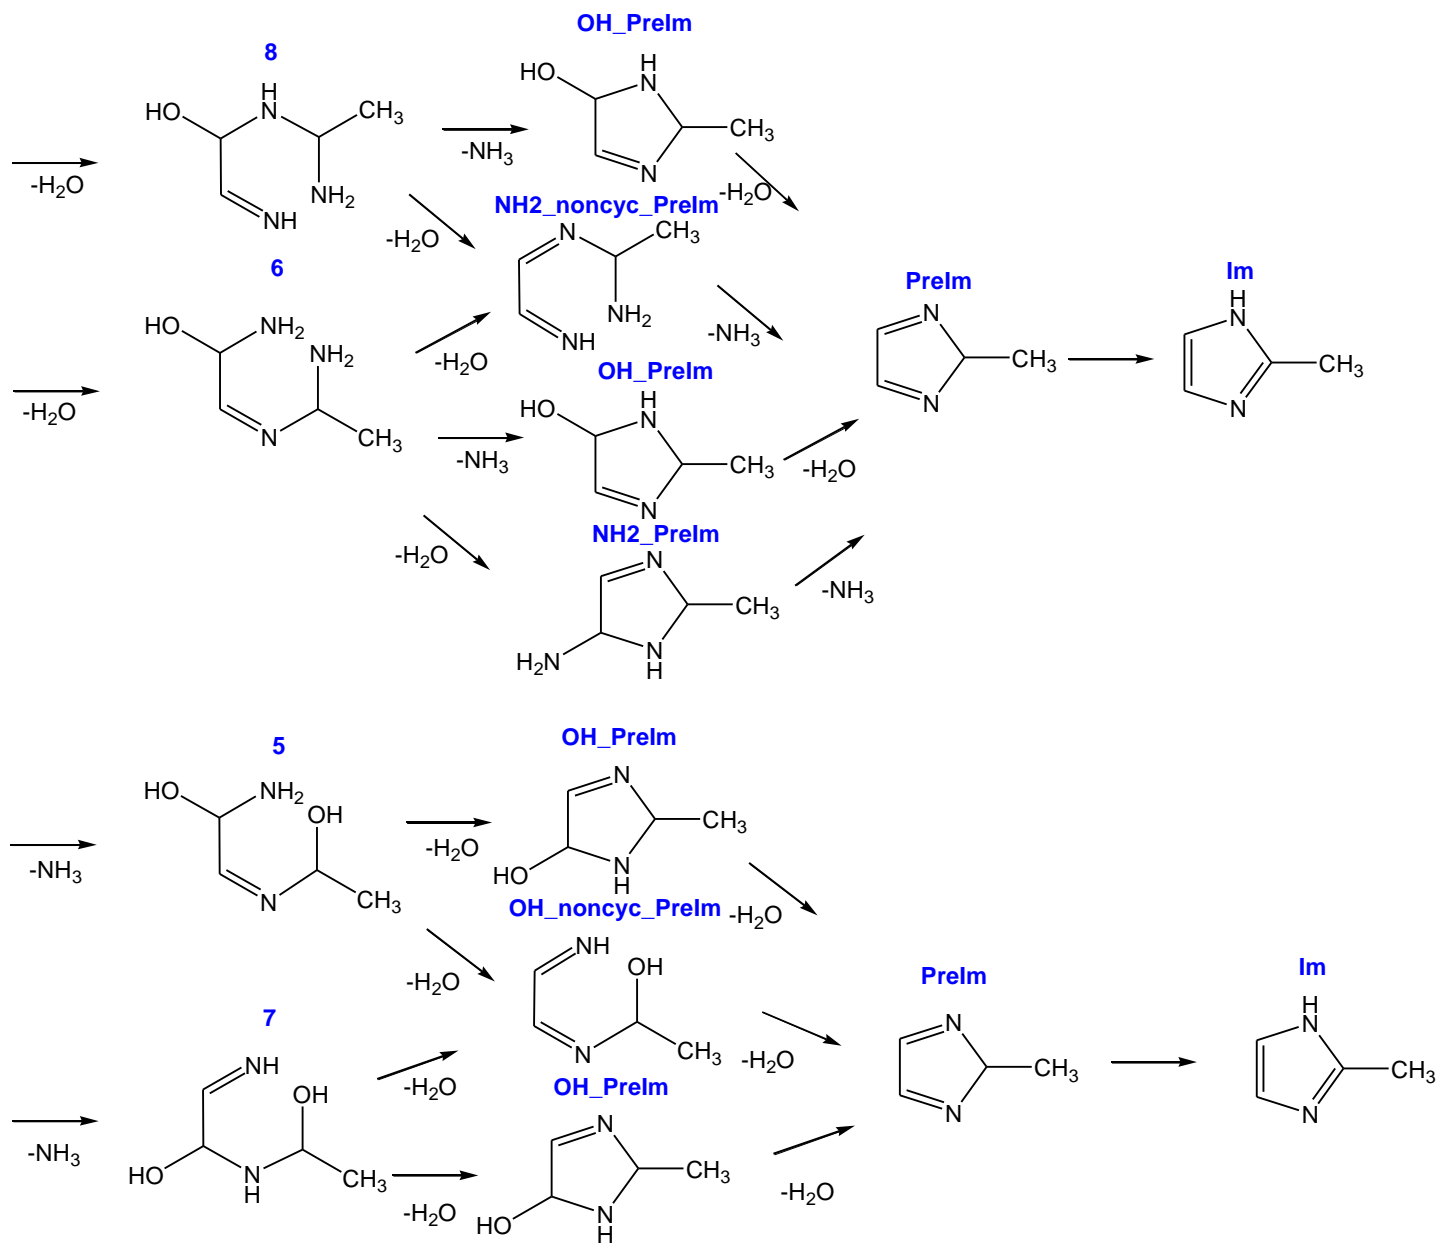

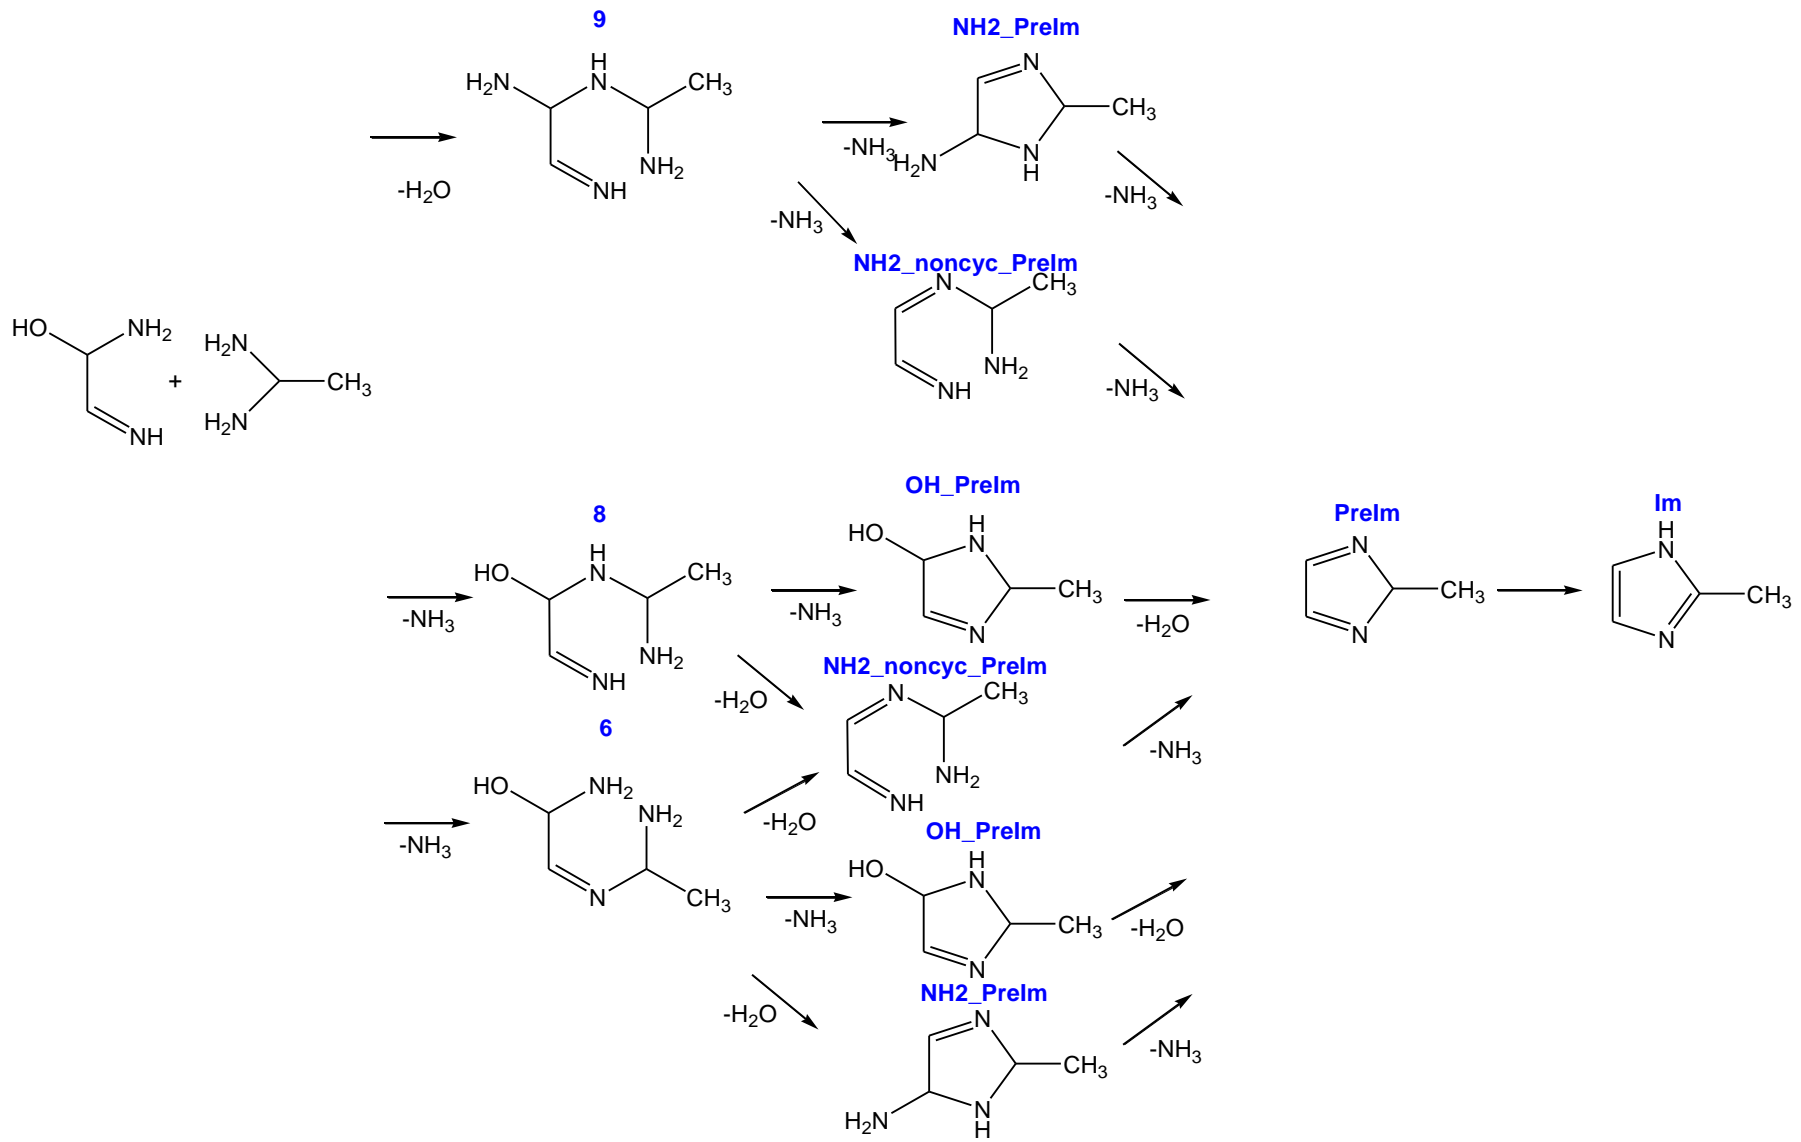



Scheme F

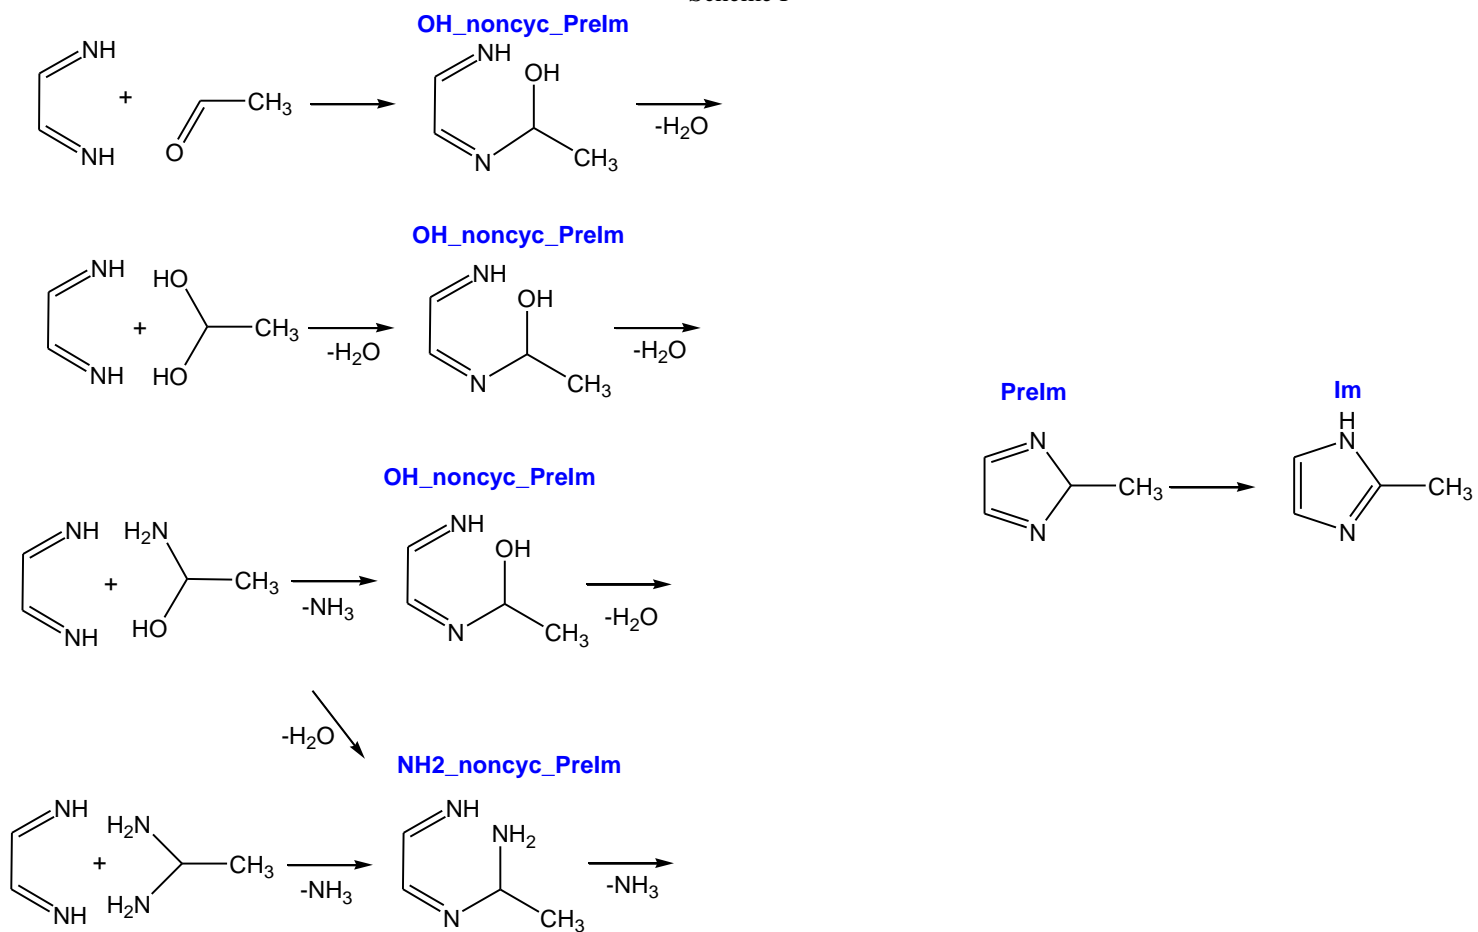

Table S1. The Gibbs free energies of the structures in solution and the PES positions of all structures of the proposed mechanism of 2-methylimidazole formation (Scheme A).

| Structure                | G, a.u.     | G, kcal/mol | Gposition |
|--------------------------|-------------|-------------|-----------|
| trans-Glyoxal (trans-GO) | -227.879412 | -142996.50  | 0.0       |
| Water                    | -76.448667  | -47972.26   | 0.0       |
| Ammonia                  | -56.563306  | -35494.01   | 0.0       |
| Acetaldehyde             | -153.850943 | -96542.93   | 0.0       |
| cis-Glyoxal (cis-GO)     | -227.875282 | -142993.90  | 2.6       |
| 1.1-ethanediol           | -230.291459 | -144510.08  | -1.1      |
| 1-aminoethanol           | -210.403067 | -132029.92  | 1.2       |
| ethanimine               | -133.954955 | -84058.01   | 6.7       |
| 1.1-diaminoethane        | -190.513636 | -119549.12  | 3.8       |
| X                        | -418.397340 | -262548.31  | -4.7      |
| 1.                       | -341.941343 | -214571.44  | 5.7       |
| 2.                       | -418.394693 | -262546.64  | -3.1      |
| OH_Pre_Im                | -341.953040 | -214578.78  | -1.7      |
| PreIm                    | -265.518264 | -166615.23  | -4.6      |
| Im                       | -265.552189 | -166636.52  | -25.9     |

Table S2. The Gibbs free energies of the structures in solution and the PES positions of all structures of the proposed mechanism of 2-methylimidazole formation (Scheme B).

| Structure                | G, a.u.     | G, kcal/mol | Gposition |
|--------------------------|-------------|-------------|-----------|
| trans-Glyoxal (trans-GO) | -227.879412 | -142996.50  | 0.0       |
| Water                    | -76.448667  | -47972.26   | 0.0       |
| Ammonia                  | -56.563306  | -35494.01   | 0.0       |
| Acetaldehyde             | -153.850943 | -96542.93   | 0.0       |
| cis-Glyoxal (cis-GO)     | -227.875282 | -142993.90  | 2.6       |
| 1.1-ethanediol           | -230.291459 | -144510.08  | -1.1      |
| 1-aminoethanol           | -210.403067 | -132029.92  | 1.2       |
| ethanimine               | -133.954955 | -84058.01   | 6.7       |
| 1.1-diaminoethane        | -190.513636 | -119549.12  | 3.8       |
| Bt_OHC-CHOHNH2           | -284.442632 | -178490.45  | -5.7      |
| Bc_OHC-CHOHNH2           | -284.440698 | -178489.24  | -4.5      |
| Y                        | -494.845299 | -310520.13  | -10.1     |
| X                        | -418.397340 | -262548.31  | -4.7      |
| Z                        | -474.956671 | -298039.82  | -8.0      |
| V                        | -398.507532 | -250067.26  | -1.9      |
| 5                        | -418.393549 | -262545.93  | -2.3      |
| 7                        | -418.386432 | -262541.46  | 2.1       |
| 2                        | -418.394693 | -262546.64  | -3.1      |
| OH_PreIm                 | -341.953040 | -214578.78  | -1.7      |
| OH_non_cyc_PreIm         | -341.94197  | -214571.83  | 5.3       |
| 1                        | -341.941343 | -214571.44  | 5.7       |
| 6                        | -398.502137 | -250063.88  | 1.5       |
| 8                        | -398.497186 | -250060.77  | 4.6       |
| 3                        | -398.505197 | -250065.80  | -0.5      |

|                   |             |            |       |
|-------------------|-------------|------------|-------|
| NH2_PreIm         | -322.067231 | -202100.25 | -1.4  |
| NH2_non_cyc_PreIm | -322.051200 | -202090.19 | 8.7   |
| PreIm             | -265.518264 | -166615.23 | -4.6  |
| Im                | -265.552189 | -166636.52 | -25.9 |

Table S3. The Gibbs free energies of the structures in solution and the PES positions of all structures of the proposed mechanism of 2-methylimidazole formation (Scheme C).

| Structure                | G, a.u.     | G, kcal/mol | Gposition |
|--------------------------|-------------|-------------|-----------|
| trans-Glyoxal (trans-GO) | -227.879412 | -142996.50  | 0.0       |
| Water                    | -76.448667  | -47972.26   | 0.0       |
| Ammonia                  | -56.563306  | -35494.01   | 0.0       |
| Acetaldehyde             | -153.850943 | -96542.93   | 0.0       |
| cis-Glyoxal (cis-GO)     | -227.875282 | -142993.90  | 2.6       |
| 1.1-ethanediol           | -230.291459 | -144510.08  | -1.1      |
| 1-aminoethanol           | -210.403067 | -132029.92  | 1.2       |
| ethanimine               | -133.954955 | -84058.01   | 6.7       |
| 1.1-diaminoethane        | -190.513636 | -119549.12  | 3.8       |
| Cc_OHC-CHNH              | -207.993268 | -130517.75  | 0.5       |
| Ct_OHC-CHNH              | -207.991031 | -130516.35  | 1.9       |
| 1                        | -341.941343 | -214571.44  | 5.7       |
| 7                        | -418.386432 | -262541.46  | 2.1       |
| 8                        | -398.497186 | -250060.77  | 4.6       |
| OH_Pre_Im                | -341.953040 | -214578.78  | -1.7      |
| OH_non_cyc_PreIm         | -341.941977 | -214571.84  | 5.3       |
| NH2_non_cyc_PreIm        | -322.051200 | -202090.19  | 8.7       |
| PreIm                    | -265.518264 | -166615.23  | -4.6      |
| Im                       | -265.552189 | -166636.52  | -25.9     |

Table S4. The Gibbs free energies of the structures in solution and the PES positions of all structures of the proposed mechanism of 2-methylimidazole formation (Scheme D).

| Structure                | G, a.u.     | G, kcal/mol | Gposition |
|--------------------------|-------------|-------------|-----------|
| trans-Glyoxal (trans-GO) | -227.879412 | -142996.50  | 0.0       |
| Water                    | -76.448667  | -47972.26   | 0.0       |
| Ammonia                  | -56.563306  | -35494.01   | 0.0       |
| Acetaldehyde             | -153.850943 | -96542.93   | 0.0       |
| cis-Glyoxal (cis-GO)     | -227.875282 | -142993.90  | 2.6       |
| 1.1-ethanediol           | -230.291459 | -144510.08  | -1.1      |
| 1-aminoethanol           | -210.403067 | -132029.92  | 1.2       |
| ethanimine               | -133.954955 | -84058.01   | 6.7       |
| 1.1-diaminoethane        | -190.513636 | -119549.12  | 3.8       |
| Dc_NH2HOHC-CHOHNH2       | -341.006158 | -213984.60  | -11.7     |
| Dt_NH2HOHC-CHOHNH3       | -340.998213 | -213979.62  | -6.7      |
| Y                        | -494.845299 | -310520.13  | -10.1     |
| Z                        | -474.956671 | -298039.82  | -8.0      |
| U                        | -474.958099 | -298040.72  | -8.9      |
| W                        | -455.066935 | -285558.82  | -5.3      |
| 2.                       | -418.394693 | -262546.64  | -3.1      |

|                   |             |            |       |
|-------------------|-------------|------------|-------|
| 3.                | -398.505197 | -250065.80 | -0.5  |
| 4.                | -378.622770 | -237589.39 | -2.3  |
| 5.                | -418.393549 | -262545.93 | -2.3  |
| 6.                | -398.502137 | -250063.88 | 1.5   |
| 7.                | -418.386432 | -262541.46 | 2.1   |
| 8.                | -398.497186 | -250060.77 | 4.6   |
| 9.                | -378.613817 | -237583.77 | 3.3   |
| 10.               | -398.501704 | -250063.61 | 1.7   |
| OH_Pre_Im         | -341.953040 | -214578.78 | -1.7  |
| OH_non_cyc_PreIm  | -341.941977 | -214571.84 | 5.3   |
| NH2_PreIm         | -322.067231 | -202100.25 | -1.4  |
| NH2_non_cyc_PreIm | -322.051200 | -202090.19 | 8.7   |
| PreIm             | -265.518264 | -166615.23 | -4.6  |
| Im                | -265.552189 | -166636.52 | -25.9 |

Table S5. The Gibbs free energies of the structures in solution and the PES positions of all structures of the proposed mechanism of 2-methylimidazole formation (Scheme E).

| Structure                | G, a.u.     | G, kcal/mol | Gposition |
|--------------------------|-------------|-------------|-----------|
| trans-Glyoxal (trans-GO) | -227.879412 | -142996.50  | 0.0       |
| Water                    | -76.448667  | -47972.26   | 0.0       |
| Ammonia                  | -56.563306  | -35494.01   | 0.0       |
| Acetaldehyde             | -153.850943 | -96542.93   | 0.0       |
| cis-Glyoxal (cis-GO)     | -227.875282 | -142993.90  | 2.6       |
| 1.1-ethanediol           | -230.291459 | -144510.08  | -1.1      |
| 1-aminoethanol           | -210.403067 | -132029.92  | 1.2       |
| ethanimine               | -133.954955 | -84058.01   | 6.7       |
| 1.1-diaminoethane        | -190.513636 | -119549.12  | 3.8       |
| Ec_NH2HOHC-CHNH          | -264.549056 | -166007.05  | -0.6      |
| Et_NH2HOHC-CHNH          | -264.545815 | -166005.01  | 1.4       |
| 5.                       | -418.393549 | -262545.93  | -2.3      |
| 6.                       | -398.502137 | -250063.88  | 1.5       |
| 7.                       | -418.386432 | -262541.46  | 2.1       |
| 8.                       | -398.497186 | -250060.77  | 4.6       |
| 9.                       | -378.613817 | -237583.77  | 3.3       |
| OH_PreIm                 | -341.953040 | -214578.78  | -1.7      |
| OH_non_cyc_PreIm         | -341.941977 | -214571.84  | 5.3       |
| NH2_PreIm                | -322.067231 | -202100.25  | -1.4      |
| NH2_non_cyc_PreIm        | -322.051200 | -202090.19  | 8.7       |
| PreIm                    | -265.518264 | -166615.23  | -4.6      |
| Im                       | -265.552189 | -166636.52  | -25.9     |

Table S6. The Gibbs free energies of the structures in solution and the PES positions of all structures of the proposed mechanism of 2-methylimidazole formation (Scheme F).

| Structure                | G, a.u.     | G, kcal/mol | Gposition |
|--------------------------|-------------|-------------|-----------|
| trans-Glyoxal (trans-GO) | -227.879412 | -142996.50  | 0.0       |
| Water                    | -76.448667  | -47972.26   | 0.0       |
| Ammonia                  | -56.563306  | -35494.01   | 0.0       |

|                      |             |            |       |
|----------------------|-------------|------------|-------|
| Acetaldehyde         | -153.850943 | -96542.93  | 0.0   |
| cis-Glyoxal (cis-GO) | -227.875282 | -142993.90 | 2.6   |
| 1.1-ethanediol       | -230.291459 | -144510.08 | -1.1  |
| 1-aminoethanol       | -210.403067 | -132029.92 | 1.2   |
| ethanimine           | -133.954955 | -84058.01  | 6.7   |
| Fc_HNHC-CHNH         | -188.099923 | -118034.49 | 5.5   |
| Ft_HNHC-CHNH         | -188.102608 | -118036.17 | 3.8   |
| OH_non_cyc_PreIm     | -341.941977 | -214571.84 | 5.3   |
| NH2_non_cyc_PreIm    | -322.051200 | -202090.19 | 8.7   |
| PreIm                | -265.518264 | -166615.23 | -4.6  |
| Im                   | -265.552189 | -166636.52 | -25.9 |

Table S7. Transition states with the participation of one water molecule, and their Gibbs free energies and stage barriers for the mechanism of 2-methylimidazole formation

| Reagents, TSs, products                                 | TS                                                                                  | G, a.u      | G, kcal/mol | $\Delta G^\ddagger$ , kcal/mol |
|---------------------------------------------------------|-------------------------------------------------------------------------------------|-------------|-------------|--------------------------------|
| cis-Glyoxal                                             | 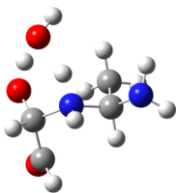   | -227.875282 | -142993.9   | 3.0                            |
| 1.1-diaminoethane                                       |                                                                                     | -190.513636 | -119549.1   |                                |
| Water                                                   |                                                                                     | -76.448667  | -47972.3    |                                |
| GO+NH <sub>2</sub> NH <sub>2</sub> CHCH <sub>3</sub> _X |                                                                                     | -494.820826 | -310504.8   |                                |
| X                                                       |                                                                                     | -418.39734  | -262548.3   |                                |
| Bc_OHC-CHOHNH <sub>2</sub>                              |    | -284.440698 | -178489.2   | 3.3                            |
| Water                                                   |                                                                                     | -76.448667  | -47972.3    |                                |
| 1-aminoethanol                                          |                                                                                     | -210.403067 | -132029.9   |                                |
| Bc+OHNH <sub>2</sub> CHCH <sub>3</sub> _Y               |                                                                                     | -571.275241 | -358480.6   |                                |
| Y                                                       |                                                                                     | -494.845299 | -310520.1   |                                |
| Dc_NH <sub>2</sub> HOHC-CHOHNH <sub>2</sub>             |    | -341.006158 | -213984.6   | 13.3                           |
| Acetaldehyde                                            |                                                                                     | -153.850943 | -96542.9    |                                |
| Water                                                   |                                                                                     | -76.448667  | -47972.3    |                                |
| Dc_Y                                                    |                                                                                     | -571.272646 | -358479.0   |                                |
| Y                                                       |                                                                                     | -494.845299 | -310520.1   |                                |
| X                                                       |   | -418.39734  | -262548.3   | 5.0                            |
| Water                                                   |                                                                                     | -76.448667  | -47972.3    |                                |
| X_2                                                     |                                                                                     | -494.82611  | -310508.1   |                                |
| 2                                                       |                                                                                     | -418.394693 | -262546.6   |                                |
| Y                                                       |                                                                                     | -494.845299 | -310520.1   |                                |
| Water                                                   |  | -76.448667  | -47972.3    | 23.4                           |
| Y_2                                                     |                                                                                     | -571.244764 | -406413.6   |                                |
| 2                                                       |                                                                                     | -418.394693 | -262546.6   |                                |
| 2                                                       |                                                                                     | -418.394693 | -262546.6   |                                |
| Water                                                   |                                                                                     | -76.448667  | -47972.3    |                                |
| 2_OH_PreIm                                              |  | -494.802258 | -310493.1   | 18.3                           |
| OH_PreIm                                                |                                                                                     | -341.953040 | -214578.8   |                                |
| 5                                                       |                                                                                     | -418.393549 | -262545.9   |                                |
| Water                                                   |  | -76.448667  | -47972.3    | 31.4                           |
| 5_OH_PreIm                                              |                                                                                     | -571.228823 | -358451.5   |                                |
| OH_PreIm                                                |                                                                                     | -341.953040 | -214578.8   |                                |
| OH_PreIm                                                |                                                                                     | -341.953040 | -214578.8   |                                |
| Water                                                   |  | -76.448667  | -47972.3    | 13.6                           |
| OH_PreIm_PreIm                                          |                                                                                     | -418.368062 | -262529.9   |                                |
| PreIm                                                   |                                                                                     | -265.518264 | -166615.2   |                                |
| PreIm                                                   |                                                                                     | -265.518264 | -166615.2   |                                |
| Water                                                   |  | -76.448667  | -47972.3    | 20.8                           |
| PreIm_2MI                                               |                                                                                     | -341.921864 | -214559.2   |                                |
| 2MI                                                     |                                                                                     | -265.552189 | -166636.5   |                                |
| 2MI                                                     |                                                                                     | -265.552189 | -166636.5   |                                |

**Identification of  $^1\text{H}$  NMR signals in the spectra of reaction mixtures of 2MI formation with different orders of mixing of reagents**

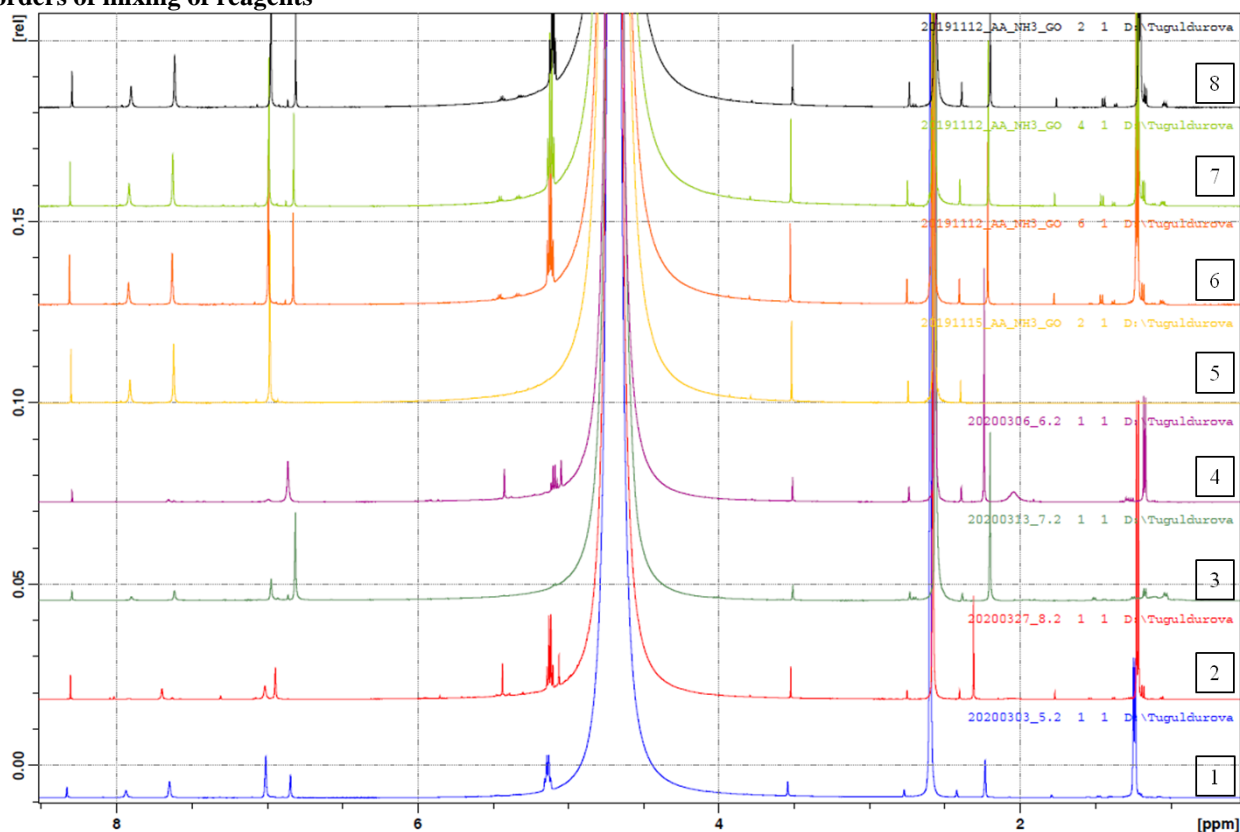

Fig. S1.  $^1\text{H}$  NMR spectra of reaction mixtures of 2MI formation with different orders of mixing of reagents.

The internal standard was DMSO.

- 1 (blue) - Acetaldehyde  $\rightarrow$  Glyoxal  $\rightarrow$  Ammonia
- 2 (red) - Glyoxal  $\rightarrow$  Ammonia  $\rightarrow$  Acetaldehyde
- 3 (green) - Acetaldehyde  $\rightarrow$  Ammonia  $\rightarrow$  Glyoxal
- 4 (purple) - Water  $\rightarrow$  Glyoxal  $\rightarrow$  Ammonia
- 5 (yellow) - Water  $\rightarrow$  lack of THT  $\rightarrow$  Glyoxal
- 6 (orange) Water  $\rightarrow$  THT  $\rightarrow$  Ammonia  $\rightarrow$  Glyoxal
- 7 (light green) - Acetaldehyde  $\rightarrow$  lack of ammonia (3 h, 10  $^\circ\text{C}$ )  $\rightarrow$  Glyoxal
- 8 (black) - Acetaldehyde  $\rightarrow$  Ammonia (3 h, 10  $^\circ\text{C}$ )  $\rightarrow$  Glyoxal

Figure S1 shows the  $^1\text{H}$  NMR spectra of the reaction mixtures of 2MI formation with different orders of mixing of the reagents at the end of the reaction. The chemical shift of the singlet signal of the protons of the internal standard (DMSO) is located in the region of 2.58 ppm. The protons of the methyl group of acetaldehyde feature a chemical shift of 1.22 ppm. The singlet of the protons of the methyl substituent in 2MI is detected at 2.21 ppm, and the signals of the methine protons of the imidazole ring of 2MI appear in a weak field (6.83 ppm). The spectral pattern of the reaction mixtures indicates the presence of additional signals in the regions of 3.53 ppm, 6.99 ppm, 7.63 ppm, 7.92 ppm, and 8.313 ppm, and these signals are related to the products of the competing reaction of glyoxal with ammonia. Singlet signal at 3.53 ppm is assigned to the protons of the  $\text{CH}_2$  group of glycolic acid formed as a result of the Cannizzaro reaction, which was shown in our previous work<sup>30</sup>. The signal at 6.99 ppm can be reliably assigned to the methine protons of the imidazole ring of hydrated imidazole-2-carbocetaldehyde (HIC) since Ref.<sup>32</sup> shows that similar protons of unhydrated imidazole-2-carbaldehyde (IC) appear in at 7.47 ppm. The 0.5 ppm shift is connected with the deactivation of the methine protons of the ring by the carbonyl group, which is characterized by a negative mesomeric effect that leads to a downfield shift of the signal, which is not observed in the case of the hydrated product. The remaining three signals in the weak field remain unidentified.

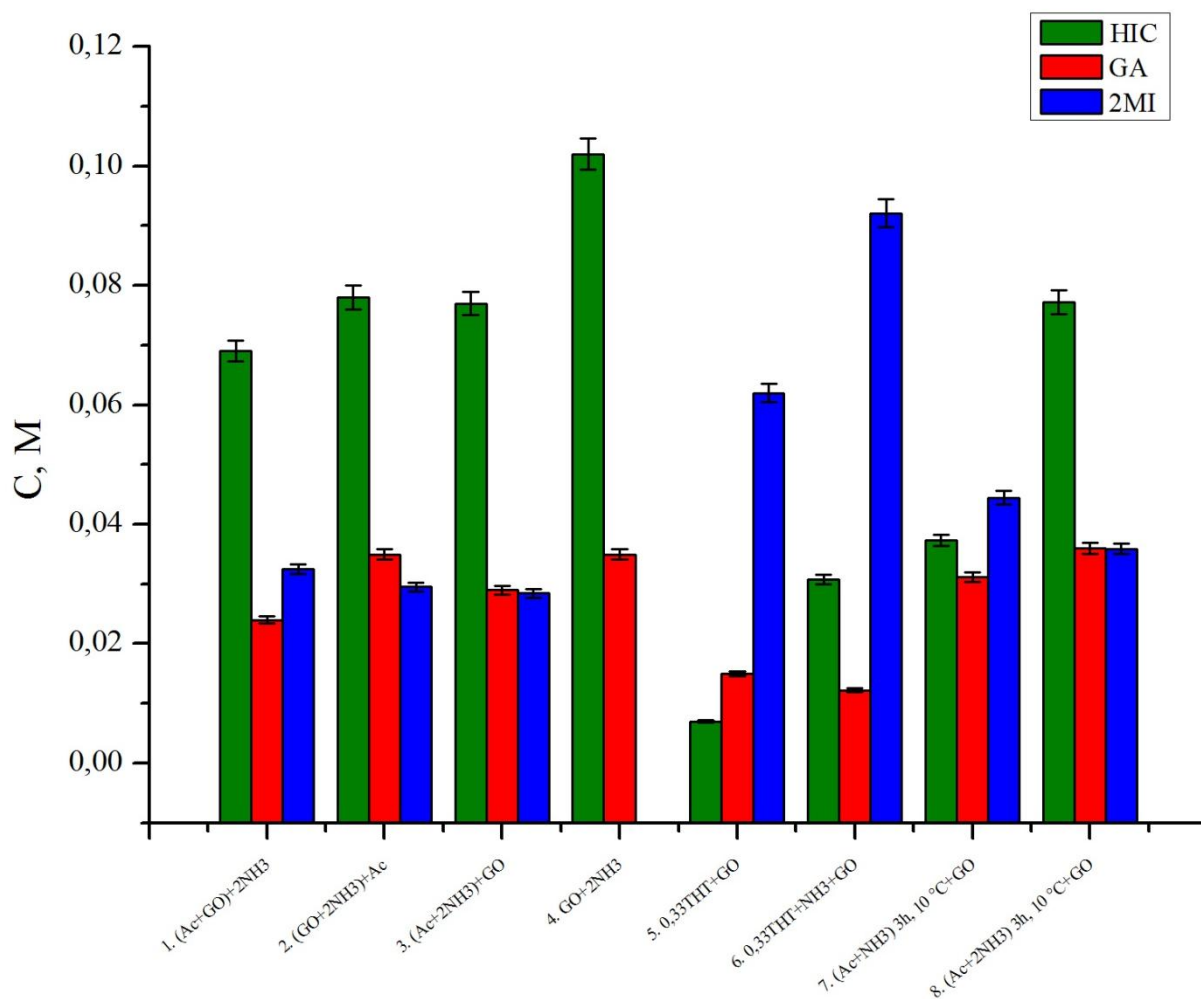

Fig. S2. Concentrations of the main products of the interaction of acetaldehyde, glyoxal, and ammonia in aqueous solution depending on the order of reagent mixing

Table S8. Concentrations of the main products, glyoxal conversion and selectivities towards the main products of the interaction of acetaldehyde, glyoxal, and ammonia in aqueous solution depending on the order of reagent mixing

| N o. | Order of reagent mixing and their molar ratios | C(HIC), M | C(GA), M | C(2MI), M | Total yield <sup>1</sup> , M | Selectivity <sup>2</sup> , % |      |      | GO Conversion <sup>3</sup> , % |
|------|------------------------------------------------|-----------|----------|-----------|------------------------------|------------------------------|------|------|--------------------------------|
|      |                                                |           |          |           |                              | HIC                          | GA   | 2MI  |                                |
| 1    | (Ac+GO)+2NH <sub>3</sub>                       | 0.069     | 0.024    | 0.033     | 0.195                        | 70.8                         | 12.3 | 16.9 | 58.6                           |
| 2    | (GO+2NH <sub>3</sub> )+Ac                      | 0.078     | 0.035    | 0.030     | 0.221                        | 70.6                         | 15.8 | 13.6 | 66.4                           |
| 3    | (Ac+2NH <sub>3</sub> )+GO                      | 0.077     | 0.029    | 0.029     | 0.212                        | 72.6                         | 13.7 | 13.7 | 63.7                           |
| 4    | GO+2NH <sub>3</sub>                            | 0.102     | 0.035    | 0.000     | 0.239                        | 85.4                         | 14.6 | 0.0  | 71.8                           |
| 5    | 0.33THT+GO                                     | 0.007     | 0.015    | 0.062     | 0.091                        | 15.4                         | 16.5 | 68.1 | 27.3                           |
| 6    | 0.33THT+NH <sub>3</sub> +GO                    | 0.031     | 0.012    | 0.092     | 0.166                        | 37.3                         | 7.2  | 55.4 | 49.8                           |
| 7    | (Ac+NH <sub>3</sub> ) 10 °C, 3h +GO            | 0.037     | 0.031    | 0.044     | 0.149                        | 49.7                         | 20.8 | 29.5 | 44.7                           |
| 8    | (Ac+2NH <sub>3</sub> ) 10 °C, 3h +GO           | 0.077     | 0.036    | 0.036     | 0.226                        | 68.1                         | 15.9 | 15.9 | 67.9                           |

<sup>1</sup>Total yield = 2·C(HIC)+C(GA)+C(2MI). 2 are because HIC formation requires 2 mol GO.

<sup>2</sup>Selectivity =  $\frac{C_i}{Total\ yield} * 100\%$ . The concentration was multiplied by 2 in the case of HIC.

<sup>3</sup>Conversion =  $\frac{Total\ yield}{C(GO)_{initial}} * 100\%$



Table S9. Cartesian coordinates of the most stable states for all structures

| Structure                                 | Atom | X       | Y       | Z       |
|-------------------------------------------|------|---------|---------|---------|
| trans-Glyoxal (trans-GO)                  | C    | 0.3291  | 0.6898  | 0.0000  |
|                                           | O    | -0.3291 | 1.6986  | -0.0001 |
|                                           | H    | 1.4356  | 0.6728  | 0.0001  |
|                                           | C    | -0.3291 | -0.6898 | 0.0000  |
|                                           | O    | 0.3291  | -1.6986 | -0.0001 |
|                                           | H    | -1.4356 | -0.6728 | 0.0001  |
| Water                                     | O    | 0.0682  | 0.2921  | -0.0000 |
|                                           | H    | 0.8072  | -0.2921 | -0.0000 |
|                                           | H    | -0.8072 | -0.0559 | 0.0000  |
| Ammonia                                   | N    | -0.0026 | 0.2314  | -0.2007 |
|                                           | H    | -0.8094 | 0.7032  | 0.2006  |
|                                           | H    | 0.8094  | 0.6942  | 0.2006  |
|                                           | H    | -0.0078 | -0.7032 | 0.2007  |
| Acetaldehyde                              | C    | 0.4646  | 0.2646  | -0.0006 |
|                                           | H    | 0.5337  | 1.3728  | -0.0001 |
|                                           | O    | 1.4692  | -0.4100 | -0.0008 |
|                                           | C    | -0.9331 | -0.2827 | -0.0004 |
|                                           | H    | -1.4692 | 0.0926  | -0.8784 |
|                                           | H    | -0.9225 | -1.3728 | -0.0009 |
|                                           | H    | -1.4687 | 0.0918  | 0.8784  |
| cis-Glyoxal (cis-GO)                      | C    | 0.0000  | -0.7730 | 0.0136  |
|                                           | O    | 0.0000  | -1.4018 | -1.0120 |
|                                           | H    | 0.0000  | -1.2506 | 1.0120  |
|                                           | C    | 0.0000  | 0.7730  | 0.0136  |
|                                           | O    | 0.0000  | 1.4018  | -1.0120 |
|                                           | H    | 0.0000  | 1.2506  | 1.0120  |
| B <sub>c</sub> _OHC-CHOHNH <sub>2</sub>   | C    | 0.8417  | -0.4904 | 0.1442  |
|                                           | O    | 1.7497  | 0.0596  | -0.4283 |
|                                           | H    | 0.9531  | -1.5070 | 0.5773  |
|                                           | O    | -0.6004 | 1.3820  | -0.1804 |
|                                           | H    | -1.5319 | 1.6270  | -0.2366 |
|                                           | N    | -1.5234 | -0.7741 | -0.4390 |
|                                           | H    | -1.1693 | -1.0217 | -1.3586 |
|                                           | H    | -1.7497 | -1.6270 | 0.0609  |
|                                           | C    | -0.5749 | 0.0570  | 0.2934  |
|                                           | H    | -0.8437 | -0.0080 | 1.3586  |
| C <sub>c</sub> _OHC-CHNH                  | C    | -0.2369 | 0.3880  | 0.0000  |
|                                           | H    | -0.1424 | 1.4785  | 0.0000  |
|                                           | C    | 1.0481  | -0.3784 | -0.0001 |
|                                           | O    | 2.1322  | 0.1573  | 0.0001  |
|                                           | H    | 0.9206  | -1.4785 | 0.0001  |
|                                           | N    | -1.3235 | -0.2695 | 0.0000  |
|                                           | H    | -2.1322 | 0.3560  | 0.0001  |
| E <sub>c</sub> _NH <sub>2</sub> HOHC-CHNH | C    | 0.5183  | -0.0316 | 0.3327  |
|                                           | H    | 0.4736  | -0.0114 | 1.4295  |
|                                           | C    | -0.8325 | -0.0075 | -0.3457 |
|                                           | H    | -0.6782 | -0.0019 | -1.4295 |
|                                           | O    | -1.4420 | 1.2181  | 0.0890  |
|                                           | H    | -2.2921 | 1.2964  | -0.3590 |
|                                           | N    | 1.5921  | -0.0723 | -0.3388 |
|                                           | H    | 2.4023  | -0.0947 | 0.2841  |
|                                           | N    | -1.5601 | -1.2053 | 0.0041  |
|                                           | H    | -1.8415 | -1.1706 | 0.9803  |
| F <sub>c</sub> _HNHC-CHNH                 | H    | -2.4023 | -1.2964 | -0.5552 |
|                                           | C    | -0.2922 | 0.4439  | 0.0003  |
|                                           | H    | -0.7698 | 1.4286  | 0.0000  |
|                                           | C    | 1.2077  | 0.4398  | -0.0003 |

|                                                                       |         |         |         |         |
|-----------------------------------------------------------------------|---------|---------|---------|---------|
|                                                                       | H       | 1.6905  | 1.4189  | -0.0002 |
|                                                                       | N       | -0.9257 | -0.6569 | 0.0000  |
|                                                                       | H       | -1.9345 | -0.5022 | -0.0002 |
|                                                                       | N       | 1.9345  | -0.6026 | -0.0003 |
|                                                                       | H       | 1.3224  | -1.4286 | -0.0001 |
| D <sub>c</sub> _NH <sub>2</sub> HOHC-CHOHNH <sub>2</sub>              | C       | -0.6299 | -0.3627 | -0.4534 |
|                                                                       | H       | -0.7285 | -1.0530 | -1.2997 |
|                                                                       | C       | 0.7616  | 0.2819  | -0.5174 |
|                                                                       | H       | 0.8624  | 0.8347  | -1.4568 |
|                                                                       | O       | 1.6663  | -0.8420 | -0.5066 |
|                                                                       | H       | 2.5645  | -0.5002 | -0.4413 |
|                                                                       | O       | -0.7423 | -1.1070 | 0.7781  |
|                                                                       | H       | 0.0216  | -1.6993 | 0.8067  |
|                                                                       | N       | -1.6500 | 0.6365  | -0.5438 |
|                                                                       | H       | -2.5645 | 0.2108  | -0.4339 |
|                                                                       | H       | -1.5206 | 1.3091  | 0.2072  |
|                                                                       | N       | 0.9321  | 1.2023  | 0.5761  |
|                                                                       | H       | 0.8970  | 0.6985  | 1.4568  |
|                                                                       | H       | 1.8136  | 1.6993  | 0.5179  |
| 1.1-ethanediol_HO(HO)CHCH <sub>3</sub>                                | C       | 1.2090  | -0.0026 | -0.2046 |
|                                                                       | H       | 1.7077  | -0.8925 | 0.1814  |
|                                                                       | H       | 1.7098  | 0.8863  | 0.1812  |
|                                                                       | H       | 1.2750  | -0.0027 | -1.2954 |
|                                                                       | C       | -0.2480 | -0.0012 | 0.2015  |
|                                                                       | H       | -0.3538 | -0.0011 | 1.2954  |
|                                                                       | O       | -0.8386 | -1.1757 | -0.3322 |
|                                                                       | H       | -1.7098 | -1.2851 | 0.0646  |
|                                                                       | O       | -0.8359 | 1.1742  | -0.3321 |
|                                                                       | H       | -1.7072 | 1.2851  | 0.0641  |
| 1-aminoethanol_HO(NH <sub>2</sub> )CHCH <sub>3</sub>                  | C       | 0.1492  | 0.3461  | 0.2296  |
|                                                                       | H       | 0.1778  | 0.3934  | 1.3265  |
|                                                                       | O       | 0.6581  | 1.6146  | -0.1785 |
|                                                                       | H       | 0.7728  | 1.5579  | -1.1363 |
|                                                                       | N       | 1.0052  | -0.6958 | -0.3269 |
|                                                                       | H       | 1.9085  | -0.6813 | 0.1376  |
|                                                                       | H       | 0.6033  | -1.6146 | -0.1669 |
|                                                                       | C       | -1.2899 | 0.1432  | -0.2335 |
|                                                                       | H       | -1.7069 | -0.7869 | 0.1630  |
|                                                                       | H       | -1.9085 | 0.9750  | 0.1071  |
| Ethanimine_NHCHCH <sub>3</sub>                                        | H       | -1.3237 | 0.1016  | -1.3265 |
|                                                                       | N       | -1.5271 | -0.3007 | -0.0005 |
|                                                                       | H       | -1.3822 | -1.3157 | -0.0007 |
|                                                                       | C       | -0.4068 | 0.3003  | -0.0003 |
|                                                                       | H       | -0.4346 | 1.3953  | -0.0001 |
|                                                                       | C       | 0.9688  | -0.3034 | -0.0002 |
|                                                                       | H       | 1.5271  | 0.0370  | -0.8785 |
|                                                                       | H       | 1.5267  | 0.0362  | 0.8785  |
| 1.1-diaminoethane_NH <sub>2</sub> (NH <sub>2</sub> )CHCH <sub>3</sub> | H       | 0.9321  | -1.3953 | -0.0008 |
|                                                                       | C       | 0.2556  | -0.0234 | 0.2282  |
|                                                                       | H       | 0.2685  | -0.0413 | 1.3297  |
|                                                                       | N       | 1.1016  | -1.1415 | -0.2054 |
|                                                                       | H       | 0.7466  | -2.0079 | 0.1902  |
|                                                                       | H       | 1.0235  | -1.2322 | -1.2167 |
|                                                                       | N       | 0.8584  | 1.1959  | -0.3221 |
|                                                                       | H       | 0.3264  | 2.0079  | -0.0224 |
|                                                                       | H       | 1.7927  | 1.3015  | 0.0640  |
|                                                                       | C       | -1.2017 | -0.1148 | -0.2360 |
|                                                                       | H       | -1.6605 | -1.0365 | 0.1306  |
|                                                                       | H       | -1.7927 | 0.7297  | 0.1336  |
| H                                                                     | -1.2426 | -0.1125 | -1.3297 |         |

|   |         |         |         |         |
|---|---------|---------|---------|---------|
| X | C       | -2.3682 | -0.8639 | -0.0349 |
|   | C       | -1.6911 | 0.4194  | -0.5350 |
|   | C       | 0.6069  | -0.1981 | 0.0427  |
|   | H       | -2.6094 | -0.8585 | 1.0434  |
|   | H       | -2.2736 | 0.7684  | -1.3959 |
|   | N       | -0.3520 | 0.1608  | -1.0089 |
|   | C       | 1.9989  | -0.3528 | -0.5710 |
|   | H       | 2.7145  | -0.6510 | 0.1986  |
|   | H       | 1.9815  | -1.1179 | -1.3526 |
|   | H       | 2.3458  | 0.5868  | -1.0122 |
|   | H       | 0.6414  | 0.5710  | 0.8253  |
|   | O       | -1.7970 | 1.3462  | 0.5518  |
|   | H       | -0.0115 | 0.9414  | -1.5601 |
|   | H       | -1.5101 | 2.2098  | 0.2354  |
|   | N       | 0.0777  | -1.4007 | 0.6823  |
|   | H       | 0.2028  | -2.2098 | 0.0792  |
|   | H       | 0.5514  | -1.5840 | 1.5601  |
|   | O       | -2.7145 | -1.7515 | -0.7799 |
| V | C       | -2.3550 | -0.9245 | -0.0208 |
|   | C       | -1.7023 | 0.3764  | -0.5204 |
|   | C       | 0.6138  | -0.2458 | 0.0551  |
|   | H       | -2.5540 | -0.9549 | 1.0673  |
|   | H       | -2.2755 | 0.6638  | -1.4134 |
|   | N       | -0.3471 | 0.1163  | -0.9916 |
|   | C       | 2.0089  | -0.3612 | -0.5629 |
|   | H       | 2.7295  | -0.6723 | 0.1968  |
|   | H       | 2.0030  | -1.1020 | -1.3680 |
|   | H       | 2.3420  | 0.5965  | -0.9752 |
|   | H       | 0.6370  | 0.4999  | 0.8599  |
|   | H       | -0.0101 | 0.9106  | -1.5256 |
|   | N       | 0.1093  | -1.4768 | 0.6621  |
|   | H       | 0.2387  | -2.2621 | 0.0291  |
|   | H       | 0.6000  | -1.6832 | 1.5256  |
|   | O       | -2.7243 | -1.8018 | -0.7680 |
|   | N       | -1.7622 | 1.3752  | 0.5570  |
|   | H       | -1.4095 | 2.2621  | 0.2078  |
| H | -2.7295 | 1.5439  | 0.8234  |         |
| Y | C       | 0.5955  | 2.0577  | -0.0597 |
|   | C       | -0.3379 | 1.3041  | 0.9241  |
|   | C       | 0.3453  | -1.0111 | 0.1458  |
|   | N       | 0.3166  | 1.6662  | -1.4376 |
|   | H       | 0.4348  | 3.1299  | 0.1199  |
|   | H       | -0.2224 | 1.7957  | 1.8970  |
|   | N       | -0.0920 | -0.1011 | 1.1692  |
|   | C       | -0.0254 | -2.4458 | 0.4969  |
|   | H       | 0.3450  | -3.1299 | -0.2685 |
|   | H       | 0.4142  | -2.7314 | 1.4590  |
|   | H       | -1.1090 | -2.5473 | 0.5750  |
|   | H       | -0.1077 | -0.7025 | -0.7929 |
|   | O       | 1.9516  | 1.8281  | 0.2509  |
|   | H       | 2.1028  | 0.8801  | 0.0697  |
|   | H       | -0.6811 | 1.7458  | -1.6093 |
|   | O       | -1.6629 | 1.5060  | 0.4216  |
|   | H       | 0.3376  | -0.2770 | 2.0675  |
|   | H       | -2.2358 | 0.9212  | 0.9310  |
| O | 1.7784  | -0.9316 | -0.1230 |         |
| H | 0.7911  | 2.3055  | -2.0675 |         |
| H | 2.2358  | -1.3771 | 0.6016  |         |
| Z | C       | 0.9933  | 0.6944  | 1.0664  |
|   | C       | 1.4689  | -0.7958 | 1.0602  |

|  |   |         |         |         |
|--|---|---------|---------|---------|
|  | C | -0.9240 | 0.7488  | -0.5321 |
|  | N | 0.4243  | 1.1842  | -0.1746 |
|  | H | 0.2278  | 0.8182  | 1.8460  |
|  | H | 2.4205  | -0.8372 | 1.6011  |
|  | N | -0.9761 | -0.7061 | -0.8141 |
|  | C | -1.3874 | 1.5222  | -1.7634 |
|  | H | -1.3232 | 2.5956  | -1.5809 |
|  | H | -0.7554 | 1.2736  | -2.6216 |
|  | H | -2.4205 | 1.2703  | -2.0150 |
|  | H | -1.5688 | 1.0081  | 0.3181  |
|  | O | 2.1491  | 1.4689  | 1.3629  |
|  | H | 1.9046  | 2.3853  | 1.1849  |
|  | H | 1.0662  | 0.9631  | -0.9337 |
|  | H | -1.8050 | -0.9395 | -1.3522 |
|  | N | 0.4257  | -1.6346 | 1.6607  |
|  | H | 0.7539  | -2.5956 | 1.6874  |
|  | H | 0.2504  | -1.3538 | 2.6216  |
|  | O | 1.7511  | -1.2665 | -0.2406 |
|  | H | -1.0135 | -1.2218 | 0.0669  |
|  | H | 0.9000  | -1.2417 | -0.7291 |
|  | C | -0.8029 | 0.6801  | 0.5513  |
|  | C | -1.7685 | -0.4731 | 0.9466  |
|  | C | 0.8201  | -0.2788 | -1.1745 |
|  | N | 0.5492  | 0.2905  | 0.1534  |
|  | H | -1.2423 | 1.2100  | -0.3020 |
|  | H | -2.5874 | -0.0297 | 1.5234  |
|  | N | 0.5144  | -1.7009 | -1.3822 |
|  | C | 2.2898  | -0.0303 | -1.5207 |
|  | H | 2.5220  | 1.0348  | -1.4750 |
|  | H | 2.9369  | -0.5501 | -0.8048 |
|  | H | 2.5182  | -0.4077 | -2.5195 |
|  | H | 0.1907  | 0.2844  | -1.8727 |
|  | H | 1.0119  | -0.2367 | 0.8885  |
|  | H | -0.4533 | -1.8645 | -1.1006 |
|  | N | -2.2272 | -1.2122 | -0.2234 |
|  | H | -2.9369 | -1.8823 | 0.0571  |
|  | H | -2.6552 | -0.5861 | -0.8998 |
|  | O | -1.1422 | -1.3737 | 1.8497  |
|  | H | 1.1115  | -2.2655 | -0.7813 |
|  | H | -0.4854 | -1.8652 | 1.3389  |
|  | N | -0.7718 | 1.5952  | 1.6936  |
|  | H | -0.5041 | 1.0625  | 2.5195  |
|  | H | -0.0234 | 2.2655  | 1.5402  |
|  | C | 0.2629  | -0.9209 | -0.2554 |
|  | C | -0.9289 | -1.8494 | 0.0840  |
|  | C | -0.0410 | 1.4912  | 0.1098  |
|  | N | -0.1663 | 0.3803  | -0.7861 |
|  | H | 0.7889  | -0.7355 | 0.6853  |
|  | H | -1.3274 | -2.2564 | -0.8593 |
|  | C | -0.5068 | 2.7846  | -0.5416 |
|  | H | 0.0828  | 2.9976  | -1.4356 |
|  | H | -1.5606 | 2.6993  | -0.8215 |
|  | H | -0.4051 | 3.6188  | 0.1554  |
|  | H | 1.0098  | 1.5700  | 0.4105  |
|  | H | -1.1096 | 0.3317  | -1.1590 |
|  | N | -0.4461 | -2.8906 | 0.9890  |
|  | H | -1.1510 | -3.6188 | 1.0638  |
|  | H | 0.3757  | -3.3171 | 0.5673  |
|  | O | -2.0160 | -1.1580 | 0.6659  |
|  | H | -1.6577 | -0.4309 | 1.2039  |

|   |        |         |         |         |
|---|--------|---------|---------|---------|
|   | O      | -0.8281 | 1.2437  | 1.3204  |
|   | H      | -0.4797 | 1.7812  | 2.0409  |
|   | N      | 1.1760  | -1.6615 | -1.1238 |
|   | H      | 0.7482  | -1.7706 | -2.0409 |
|   | H      | 2.0160  | -1.1096 | -1.2714 |
| 1 | C      | -1.9906 | 0.1615  | 0.2426  |
|   | C      | -1.0965 | -1.0256 | -0.0170 |
|   | C      | 1.1270  | -0.0718 | -0.4076 |
|   | N      | 0.6788  | 1.2901  | -0.0996 |
|   | H      | -1.6746 | -1.9548 | 0.0297  |
|   | N      | 0.1401  | -1.1325 | -0.2871 |
|   | C      | 2.3594  | -0.5109 | 0.4048  |
|   | H      | 3.1701  | 0.2057  | 0.2573  |
|   | H      | 2.1095  | -0.5391 | 1.4697  |
|   | H      | 2.6993  | -1.5026 | 0.1012  |
|   | H      | 1.4000  | -0.0836 | -1.4697 |
|   | O      | -3.1701 | -0.0341 | 0.4568  |
|   | H      | -1.5503 | 1.1649  | 0.2119  |
|   | H      | 1.3309  | 1.9548  | -0.5049 |
|   | H      | 0.7065  | 1.4436  | 0.9066  |
| 2 | C      | 1.6736  | -0.7374 | -0.2987 |
|   | C      | 1.6425  | 0.6588  | 0.3681  |
|   | C      | -0.5125 | 0.1430  | -0.3232 |
|   | N      | 0.2627  | -1.0770 | -0.5922 |
|   | H      | 2.2511  | -0.6658 | -1.2254 |
|   | H      | 2.3054  | 0.7030  | 1.2359  |
|   | N      | 0.2584  | 0.7966  | 0.7552  |
|   | C      | -1.9459 | -0.1464 | 0.0826  |
|   | H      | -2.4621 | -0.6991 | -0.7059 |
|   | H      | -1.9630 | -0.7367 | 1.0034  |
|   | H      | -2.4880 | 0.7857  | 0.2601  |
|   | H      | -0.5061 | 0.7562  | -1.2359 |
|   | O      | 2.2634  | -1.6723 | 0.5844  |
|   | H      | 2.4880  | -2.4605 | 0.0784  |
|   | H      | 0.0015  | -1.7646 | 0.1125  |
|   | O      | 2.0833  | 1.5922  | -0.6345 |
|   | H      | -0.0074 | 1.7640  | 0.9131  |
|   | H      | 2.1433  | 2.4605  | -0.2216 |
| 3 | C      | 1.0413  | 0.6789  | 0.3608  |
|   | C      | 1.0027  | -0.6888 | -0.3289 |
|   | C      | -1.1628 | -0.1343 | 0.4683  |
|   | N      | -0.3640 | 1.1118  | 0.3648  |
|   | H      | 1.3898  | 0.5446  | 1.3946  |
|   | H      | 0.9214  | -0.4969 | -1.4109 |
|   | N      | -0.2534 | -1.2801 | 0.1524  |
|   | C      | -2.3736 | -0.0945 | -0.4561 |
|   | H      | -2.9918 | 0.7836  | -0.2482 |
|   | H      | -2.0513 | -0.0588 | -1.5010 |
|   | H      | -2.9826 | -0.9897 | -0.3156 |
|   | H      | -1.5064 | -0.2531 | 1.5010  |
|   | O      | 1.8767  | 1.5621  | -0.3506 |
|   | H      | 2.0015  | 2.3567  | 0.1796  |
|   | H      | -0.5283 | 1.5325  | -0.5483 |
|   | H      | -0.0217 | -1.7620 | 1.0174  |
|   | N      | 2.1364  | -1.5278 | 0.0280  |
| H | 2.1489 | -2.3567 | -0.5595 |         |
| H | 2.9918 | -1.0201 | -0.1828 |         |
| 4 | C      | -1.1482 | -0.4184 | -0.3779 |
|   | C      | -1.1337 | 1.0004  | 0.2593  |
|   | C      | 1.0320  | 0.1893  | 0.3402  |

|  |   |         |         |         |
|--|---|---------|---------|---------|
|  | N | 0.2633  | -0.8809 | -0.3167 |
|  | H | -1.4583 | -0.3309 | -1.4229 |
|  | H | -1.3945 | 0.8902  | 1.3266  |
|  | N | 0.2534  | 1.4081  | 0.0671  |
|  | C | 2.4603  | 0.2865  | -0.1658 |
|  | H | 2.9888  | -0.6567 | -0.0064 |
|  | H | 2.4607  | 0.5208  | -1.2344 |
|  | H | 3.0011  | 1.0764  | 0.3611  |
|  | H | 1.0489  | -0.0247 | 1.4229  |
|  | N | -2.0453 | 1.9902  | -0.2968 |
|  | H | -3.0011 | 1.6673  | -0.1714 |
|  | H | -1.8863 | 2.0539  | -1.3000 |
|  | H | 0.5024  | 2.1655  | 0.6972  |
|  | N | -2.1286 | -1.2629 | 0.2896  |
|  | H | -1.8144 | -1.4524 | 1.2389  |
|  | H | -2.1701 | -2.1655 | -0.1752 |
|  | H | 0.6133  | -0.9925 | -1.2629 |
|  | C | 1.9384  | -0.2373 | 0.4217  |
|  | C | 0.8205  | 0.7968  | 0.1957  |
|  | C | -1.0882 | -0.6169 | -0.3454 |
|  | N | 2.1314  | -1.0423 | -0.7988 |
|  | H | 2.8406  | 0.3171  | 0.6968  |
|  | H | 1.1475  | 1.8304  | 0.3363  |
|  | N | -0.4002 | 0.6409  | -0.1108 |
|  | C | -2.3146 | -0.6777 | 0.5599  |
|  | H | -2.8880 | -1.5792 | 0.3390  |
|  | H | -1.9941 | -0.7113 | 1.6044  |
|  | H | -2.9468 | 0.1980  | 0.4112  |
|  | H | -1.4116 | -0.5617 | -1.3943 |
|  | O | 1.6805  | -1.0881 | 1.5197  |
|  | H | 0.8564  | -1.5587 | 1.2970  |
|  | H | 2.9468  | -1.6374 | -0.6783 |
|  | H | 2.3053  | -0.4468 | -1.6044 |
|  | O | -0.3646 | -1.8304 | -0.1426 |
|  | H | 0.4632  | -1.7818 | -0.6794 |
|  | C | 0.8282  | -1.0773 | -0.2899 |
|  | C | 1.8945  | -0.0221 | -0.6012 |
|  | C | -1.2373 | 0.1628  | -0.4143 |
|  | N | -0.4374 | -1.0490 | -0.1795 |
|  | H | 1.2936  | -2.0492 | -0.0874 |
|  | H | 2.5312  | -0.4486 | -1.3841 |
|  | N | -0.7825 | 1.2582  | 0.4730  |
|  | C | -2.7098 | -0.1980 | -0.2244 |
|  | H | -2.9970 | -0.9955 | -0.9142 |
|  | H | -2.8796 | -0.5491 | 0.7976  |
|  | H | -3.3484 | 0.6696  | -0.4105 |
|  | H | -1.0767 | 0.5084  | -1.4413 |
|  | H | -1.4177 | 2.0492  | 0.3983  |
|  | N | 2.7537  | 0.1757  | 0.5792  |
|  | H | 2.1813  | 0.2825  | 1.4131  |
|  | H | 3.3484  | -0.6340 | 0.7317  |
|  | O | 1.4093  | 1.1983  | -1.0921 |
|  | H | 0.7289  | 1.4970  | -0.4415 |
|  | H | -0.8191 | 0.9464  | 1.4413  |
|  | C | 1.3080  | -0.2011 | -0.3876 |
|  | C | 1.5867  | 1.0654  | 0.4224  |
|  | C | -1.2375 | -0.3977 | -0.1476 |
|  | N | -0.0153 | -0.4720 | -0.8967 |
|  | H | 1.9433  | -0.1144 | -1.2821 |
|  | H | 2.5931  | 1.0603  | 0.8544  |

|    |         |         |         |         |
|----|---------|---------|---------|---------|
|    | N       | 0.8520  | 2.0803  | 0.5982  |
|    | C       | -1.1078 | -0.8644 | 1.2974  |
|    | H       | -0.7307 | -1.8864 | 1.3387  |
|    | H       | -0.4295 | -0.2195 | 1.8560  |
|    | H       | -2.0897 | -0.8315 | 1.7752  |
|    | H       | -1.9642 | -1.0312 | -0.6693 |
|    | O       | 1.7873  | -1.2661 | 0.4378  |
|    | H       | 1.6316  | -2.0803 | -0.0551 |
|    | H       | -0.1366 | -0.1811 | -1.8560 |
|    | O       | -1.7444 | 0.9659  | -0.2084 |
|    | H       | -2.5931 | 0.9987  | 0.2501  |
|    | H       | -0.0680 | 1.9388  | 0.1648  |
| 8  | C       | 1.3309  | -0.1936 | -0.4142 |
|    | C       | 1.6023  | 1.0881  | 0.3761  |
|    | C       | -1.2252 | -0.4510 | -0.1335 |
|    | N       | 0.0132  | -0.5216 | -0.8983 |
|    | H       | 1.9510  | -0.1045 | -1.3199 |
|    | H       | 2.6430  | 1.1319  | 0.7190  |
|    | N       | 0.8333  | 2.0599  | 0.6298  |
|    | C       | -1.0555 | -0.9134 | 1.3113  |
|    | H       | -0.6209 | -1.9120 | 1.3423  |
|    | H       | -0.4052 | -0.2365 | 1.8666  |
|    | H       | -2.0305 | -0.9378 | 1.8039  |
|    | H       | -1.9088 | -1.1491 | -0.6348 |
|    | O       | 1.8588  | -1.2348 | 0.4202  |
|    | H       | 1.6796  | -2.0599 | -0.0461 |
|    | H       | -0.1153 | -0.2647 | -1.8666 |
|    | H       | -0.1204 | 1.8685  | 0.2795  |
|    | N       | -1.7987 | 0.9187  | -0.1470 |
| H  | -2.0874 | 1.1535  | -1.0935 |         |
| H  | -2.6430 | 0.9462  | 0.4204  |         |
| 9  | C       | -1.3941 | -0.6154 | 0.3102  |
|    | C       | -2.0462 | 0.7623  | 0.4104  |
|    | C       | 1.0272  | -0.0016 | 0.2543  |
|    | N       | -0.1276 | -0.6073 | -0.4143 |
|    | H       | -1.2788 | -0.9873 | 1.3441  |
|    | H       | -3.0264 | 0.7192  | 0.9029  |
|    | N       | -1.6332 | 1.8812  | -0.0182 |
|    | C       | 2.2121  | -0.9730 | 0.2522  |
|    | H       | 1.9775  | -1.8812 | 0.8152  |
|    | H       | 2.4629  | -1.2545 | -0.7761 |
|    | H       | 3.0917  | -0.5061 | 0.7007  |
|    | H       | 0.7728  | 0.2368  | 1.2956  |
|    | H       | 0.0672  | -1.5692 | -0.6645 |
|    | N       | -2.2748 | -1.5676 | -0.3784 |
|    | H       | -3.0917 | -1.7681 | 0.1898  |
|    | H       | -2.6085 | -1.1555 | -1.2464 |
|    | N       | 1.3237  | 1.2879  | -0.3992 |
| H  | 2.0752  | 1.7646  | 0.0931  |         |
| H  | 1.6558  | 1.1078  | -1.3441 |         |
| H  | -0.6875 | 1.7880  | -0.4180 |         |
| 10 | C       | -1.3996 | -0.5742 | 0.2572  |
|    | C       | -2.0259 | 0.8161  | 0.3346  |
|    | C       | 1.0214  | -0.0149 | 0.2116  |
|    | N       | -0.1295 | -0.5715 | -0.4586 |
|    | H       | -1.2928 | -0.9434 | 1.2908  |
|    | H       | -2.9586 | 0.8346  | 0.9100  |
|    | N       | -1.6308 | 1.8877  | -0.2164 |
|    | C       | 2.2161  | -0.9604 | 0.1598  |
| H  | 2.0008  | -1.8877 | 0.6972  |         |

|                 |         |         |         |         |
|-----------------|---------|---------|---------|---------|
|                 | H       | 2.4494  | -1.1955 | -0.8824 |
|                 | H       | 3.0939  | -0.4940 | 0.6117  |
|                 | H       | 0.7717  | 0.2129  | 1.2578  |
|                 | H       | 0.0419  | -1.5081 | -0.8007 |
|                 | N       | -2.2884 | -1.5143 | -0.4347 |
|                 | H       | -3.0939 | -1.7310 | 0.1432  |
|                 | H       | -2.6380 | -1.0912 | -1.2908 |
|                 | H       | -0.7398 | 1.7196  | -0.6972 |
|                 | O       | 1.3465  | 1.2276  | -0.4544 |
|                 | H       | 1.9545  | 1.7173  | 0.1122  |
| OH_PreIm        | C       | -1.4013 | -0.2091 | 0.4526  |
|                 | C       | -0.8269 | 1.0804  | -0.0983 |
|                 | C       | 0.9504  | -0.0934 | 0.5211  |
|                 | N       | -0.2346 | -0.7320 | 1.1309  |
|                 | H       | -2.2423 | -0.0686 | 1.1387  |
|                 | H       | -1.4488 | 1.8568  | -0.5346 |
|                 | N       | 0.4419  | 1.1363  | -0.1025 |
|                 | C       | 1.6768  | -0.9513 | -0.5184 |
|                 | H       | 2.0697  | -1.8568 | -0.0488 |
|                 | H       | 0.9792  | -1.2379 | -1.3085 |
|                 | H       | 2.5113  | -0.3999 | -0.9576 |
|                 | H       | 1.6536  | 0.1982  | 1.3085  |
|                 | O       | -1.8503 | -0.9681 | -0.6861 |
|                 | H       | -2.5113 | -1.5984 | -0.3805 |
|                 | H       | -0.2030 | -1.7445 | 1.1257  |
| NH2_PreIm       | C       | -1.2148 | -0.2231 | 0.5195  |
|                 | C       | -0.6348 | 1.0552  | -0.0608 |
|                 | C       | 1.1697  | -0.1102 | 0.5091  |
|                 | N       | 0.0072  | -0.8954 | 0.9817  |
|                 | H       | -1.8985 | -0.0095 | 1.3496  |
|                 | H       | -1.2667 | 1.8450  | -0.4620 |
|                 | N       | 0.6326  | 1.1115  | -0.1151 |
|                 | C       | 2.0752  | -0.8667 | -0.4604 |
|                 | H       | 2.4672  | -1.7696 | 0.0148  |
|                 | H       | 1.5148  | -1.1560 | -1.3539 |
|                 | H       | 2.9188  | -0.2418 | -0.7616 |
|                 | H       | 1.7675  | 0.2181  | 1.3687  |
|                 | H       | 0.0204  | -1.8450 | 0.6278  |
|                 | N       | -1.9636 | -1.0330 | -0.4467 |
|                 | H       | -2.9188 | -0.6994 | -0.5317 |
| H               | -1.5387 | -0.9737 | -1.3687 |         |
| OH_noncycPreIm  | C       | -0.9684 | 0.8884  | -0.5641 |
|                 | H       | -1.3842 | 1.8330  | -0.9245 |
|                 | C       | -2.0156 | -0.0771 | -0.1145 |
|                 | H       | -2.9622 | 0.3914  | 0.1730  |
|                 | N       | -1.8412 | -1.3385 | -0.0985 |
|                 | H       | -2.6705 | -1.8330 | 0.2303  |
|                 | N       | 0.2999  | 0.7876  | -0.5534 |
|                 | C       | 0.9625  | -0.4389 | -0.0482 |
|                 | H       | 0.5531  | -0.6626 | 0.9491  |
|                 | O       | 0.7612  | -1.5319 | -0.9203 |
|                 | H       | -0.1710 | -1.7936 | -0.7778 |
|                 | C       | 2.4542  | -0.1802 | 0.0469  |
|                 | H       | 2.6541  | 0.6756  | 0.6949  |
|                 | H       | 2.9622  | -1.0587 | 0.4495  |
|                 | H       | 2.8493  | 0.0351  | -0.9491 |
| NH2_noncycPreIm | C       | -2.0529 | -0.2211 | -0.4419 |
|                 | C       | -1.0479 | -1.1272 | 0.2020  |
|                 | C       | 0.9272  | 0.0649  | -0.4132 |
|                 | N       | -2.0193 | 1.0483  | -0.5199 |



|       |        |         |         |         |
|-------|--------|---------|---------|---------|
|       | H      | -2.9253 | -0.7479 | -0.8442 |
|       | H      | -1.4952 | -2.0020 | 0.6842  |
|       | N      | 0.2213  | -1.0442 | 0.2474  |
|       | C      | 2.3676  | -0.3736 | -0.6739 |
|       | H      | 2.9253  | 0.4255  | -1.1695 |
|       | H      | 2.8613  | -0.6158 | 0.2713  |
|       | H      | 2.3908  | -1.2594 | -1.3143 |
|       | H      | 0.4484  | 0.3122  | -1.3702 |
|       | N      | 0.8047  | 1.2605  | 0.4422  |
|       | H      | -1.1615 | 1.4031  | -0.0686 |
|       | H      | 1.1634  | 1.0453  | 1.3702  |
|       | H      | 1.3929  | 2.0020  | 0.0698  |
| PreIm | C      | -0.5834 | -1.3914 | 0.7395  |
|       | C      | -0.5834 | -1.3914 | -0.7395 |
|       | C      | -0.5911 | 0.6649  | 0.0000  |
|       | N      | -0.5886 | -0.1905 | 1.1898  |
|       | H      | -0.5794 | -2.2662 | 1.3808  |
|       | H      | -0.5794 | -2.2662 | -1.3808 |
|       | N      | -0.5886 | -0.1905 | -1.1898 |
|       | C      | 0.5923  | 1.6356  | 0.0000  |
|       | H      | 0.5555  | 2.2662  | 0.8890  |
|       | H      | 1.5309  | 1.0769  | 0.0000  |
|       | H      | 0.5555  | 2.2662  | -0.8890 |
| 2MI   | H      | -1.5309 | 1.2324  | 0.0000  |
|       | C      | -1.5859 | 0.3504  | -0.0001 |
|       | C      | -1.5379 | -1.0175 | -0.0007 |
|       | C      | 0.5171  | -0.3625 | -0.0005 |
|       | N      | -0.2677 | 0.7549  | -0.0005 |
|       | H      | -2.4019 | 1.0533  | 0.0000  |
|       | H      | -2.3654 | -1.7104 | -0.0009 |
|       | N      | -0.2265 | -1.4543 | 0.0000  |
|       | C      | 2.0092  | -0.3098 | -0.0005 |
|       | H      | 2.3902  | 0.2126  | -0.8830 |
|       | H      | 2.3902  | 0.2108  | 0.8830  |
| H     | 2.4019 | -1.3259 | -0.0015 |         |
| H     | 0.0563 | 1.7104  | -0.0008 |         |

Table S10. Cartesian coordinates of the transition states with the participation of one water molecule

| TS                                                      | Atom | X       | Y       | Z       |
|---------------------------------------------------------|------|---------|---------|---------|
| GO+NH <sub>2</sub> NH <sub>2</sub> CHCH <sub>3</sub> _X | C    | -2.1313 | 1.2791  | -0.5787 |
|                                                         | H    | -2.0731 | 1.9593  | -1.4540 |
|                                                         | C    | -1.3188 | -0.0114 | -0.7240 |
|                                                         | H    | -1.6191 | -0.4422 | -1.6997 |
|                                                         | O    | -1.4247 | -0.8605 | 0.3199  |
|                                                         | O    | -2.8112 | 1.5376  | 0.3806  |
|                                                         | O    | 0.6514  | -1.9945 | -0.1251 |
|                                                         | H    | 1.2333  | -2.0539 | 0.6392  |
|                                                         | H    | -0.4963 | -1.5360 | 0.2315  |
|                                                         | C    | 0.7975  | 1.4465  | -0.1174 |
|                                                         | C    | 0.7273  | 1.0712  | 1.3598  |
|                                                         | H    | 1.1625  | 1.8830  | 1.9446  |
|                                                         | H    | -0.2990 | 0.8965  | 1.6804  |
|                                                         | H    | 1.2977  | 0.1585  | 1.5429  |
|                                                         | N    | 0.1695  | 0.3589  | -0.9683 |
|                                                         | H    | 0.3406  | 0.5958  | -1.9446 |
|                                                         | H    | 0.6516  | -0.6154 | -0.7298 |
|                                                         | H    | 0.2256  | 2.3583  | -0.3009 |
|                                                         | N    | 2.1299  | 1.6422  | -0.6513 |
|                                                         | H    | 2.4124  | 2.6110  | -0.5654 |

|                 |   |         |         |         |
|-----------------|---|---------|---------|---------|
|                 | H | 2.8112  | 1.0752  | -0.1564 |
|                 | H | -0.9569 | -1.6781 | 0.3114  |
|                 | H | -0.0530 | -2.6110 | -0.2297 |
|                 | H | -0.9939 | -1.6473 | -0.2363 |
|                 | H | 0.0437  | -0.8679 | -0.9430 |
|                 | C | -1.9178 | -0.6610 | -0.5905 |
|                 | H | -1.9274 | 0.1892  | -1.2846 |
|                 | C | -0.6881 | -0.5152 | 0.3308  |
|                 | H | -0.6176 | -1.4171 | 0.9531  |
|                 | N | 0.5325  | -0.5022 | -0.5949 |
|                 | H | 0.4089  | -1.1953 | -1.3359 |
|                 | C | 1.8369  | -0.7151 | 0.1141  |
|                 | H | 1.8222  | -0.0077 | 0.9465  |
|                 | C | 2.9828  | -0.4331 | -0.8362 |
|                 | H | 2.9142  | 0.5816  | -1.2322 |
|                 | H | 3.9262  | -0.5413 | -0.3006 |
|                 | H | 2.9677  | -1.1438 | -1.6663 |
|                 | O | -0.6898 | 0.6302  | 1.0734  |
|                 | H | -0.4012 | 1.4418  | 0.2975  |
|                 | O | 0.0349  | 1.9985  | -0.7762 |
|                 | H | 0.7763  | 2.5731  | -0.5589 |
|                 | H | 0.4981  | 0.5307  | -0.9664 |
|                 | N | -3.0877 | -0.7641 | 0.2525  |
|                 | H | -3.0121 | -0.0795 | 0.9999  |
|                 | H | -3.9262 | -0.5487 | -0.2770 |
|                 | O | -1.7966 | -1.8145 | -1.4205 |
|                 | H | -2.0053 | -2.5731 | -0.8582 |
|                 | O | 1.9257  | -2.0455 | 0.5562  |
|                 | H | 1.5184  | -2.1242 | 1.4251  |
|                 | H | 0.0202  | 0.8083  | 1.6663  |
|                 | H | -0.8297 | 0.9537  | 0.0588  |
|                 | H | -0.2099 | 1.3033  | -0.1896 |
|                 | H | -0.0638 | 0.1366  | -1.0553 |
|                 | C | -1.0679 | 0.5698  | 0.4486  |
|                 | C | -0.5636 | -0.3006 | -0.7234 |
|                 | N | 0.9328  | -0.2263 | -0.9036 |
|                 | H | 1.2239  | 0.8471  | -0.9818 |
|                 | H | 1.1741  | -0.7059 | -1.7702 |
|                 | C | 1.6200  | -2.0536 | 0.7763  |
|                 | H | 1.5728  | -2.8069 | -0.0116 |
|                 | H | 0.6745  | -2.0410 | 1.3139  |
|                 | H | 2.4266  | -2.3114 | 1.4657  |
|                 | C | 1.9259  | -0.6809 | 0.2082  |
|                 | H | 2.8695  | -0.7110 | -0.3548 |
|                 | O | 1.9508  | 0.3020  | 1.1781  |
|                 | O | 1.8942  | 2.0837  | -0.4430 |
|                 | H | 1.9954  | 1.2674  | 0.5730  |
|                 | H | 1.2905  | 2.8069  | -0.2475 |
|                 | H | -0.6797 | 1.5820  | 0.2854  |
|                 | H | -0.9678 | 0.1393  | -1.6389 |
|                 | O | -1.0018 | -1.6175 | -0.5499 |
|                 | H | -1.1318 | -2.0279 | -1.4115 |
|                 | O | -0.6577 | 0.0898  | 1.7201  |
|                 | H | 0.3171  | 0.2176  | 1.7702  |
|                 | N | -2.5052 | 0.6087  | 0.3491  |
|                 | H | -2.8599 | -0.3316 | 0.5060  |
|                 | H | -2.8695 | 1.1903  | 1.0972  |
|                 | H | 1.3976  | -0.6804 | -0.1174 |
|                 | H | 0.7129  | 0.3910  | -1.0802 |
|                 | H | 1.0980  | -0.4100 | -0.4845 |
| Bc+OHNH2CHCH3_Y |   |         |         |         |
| Dc_Y            |   |         |         |         |

|            |     |         |         |         |
|------------|-----|---------|---------|---------|
|            | H   | 2.1314  | 1.1951  | 0.9391  |
|            | H   | 1.5655  | 1.2047  | -0.5240 |
|            | H   | 1.4977  | 0.8506  | 0.3332  |
| X_2        | C   | 1.1953  | -0.2840 | 0.7837  |
|            | H   | 0.8698  | -0.3985 | 1.8263  |
|            | C   | 0.5615  | -1.4434 | -0.0334 |
|            | H   | 0.5970  | -2.3822 | 0.5289  |
|            | O   | 1.2544  | -1.5385 | -1.2628 |
|            | O   | 2.5235  | -0.0680 | 0.6762  |
|            | O   | 2.4699  | 1.5788  | -1.0829 |
|            | H   | 2.6604  | 0.6615  | -0.2046 |
|            | H   | 0.7319  | -2.1214 | -1.8263 |
|            | C   | -0.8022 | 0.3696  | -0.5579 |
|            | C   | -2.1018 | 1.0762  | -0.2303 |
|            | H   | -2.0428 | 2.1342  | -0.4916 |
|            | H   | -2.9150 | 0.6242  | -0.8003 |
|            | H   | -2.3323 | 0.9881  | 0.8356  |
|            | N   | -0.8249 | -1.0607 | -0.2660 |
|            | H   | -1.3877 | -1.2527 | 0.5584  |
|            | H   | 2.8702  | 2.3822  | -0.7335 |
|            | H   | -0.5448 | 0.5018  | -1.6094 |
|            | N   | 0.3754  | 0.9289  | 0.2131  |
|            | H   | 1.1199  | 1.4319  | -0.4342 |
|            | H   | 0.0854  | 1.5480  | 0.9656  |
|            | H   | 0.8160  | 0.6528  | 0.3174  |
|            | H   | 2.9150  | 0.0453  | -0.1730 |
|            | H   | 1.6819  | 1.2380  | -0.6953 |
|            | H   | 2.0719  | 0.3403  | -0.3757 |
|            | H   | 0.9037  | 0.1532  | 0.6123  |
|            | H   | 0.6321  | 0.9708  | -0.6025 |
|            | Y_2 | C       | 0.6913  | 1.7261  |
| C          |     | 1.1789  | 0.8318  | 0.7024  |
| C          |     | -1.2031 | 0.3886  | -1.2109 |
| H          |     | -0.0058 | 2.4708  | -0.1205 |
| H          |     | 1.4604  | 1.5441  | 1.4921  |
| N          |     | -0.0097 | 0.8323  | -1.4249 |
| H          |     | 0.6327  | 0.1938  | -1.9410 |
| N          |     | 0.2240  | -0.1027 | 1.0556  |
| H          |     | 0.1952  | -1.4841 | 0.3100  |
| C          |     | -2.2968 | 1.0431  | -0.4550 |
| H          |     | -1.9789 | 1.8877  | 0.1474  |
| O          |     | 2.4686  | 0.1995  | 0.2590  |
| H          |     | 3.0562  | 0.9184  | -0.0140 |
| O          |     | 1.7915  | 2.3179  | -1.1377 |
| H          |     | 1.4935  | 3.0755  | -1.6533 |
| H          |     | -1.4628 | -0.5050 | -1.7714 |
| H          |     | 0.1912  | -0.1962 | 2.0656  |
| O          |     | 0.1704  | -2.3782 | -0.2428 |
| H          |     | -0.7626 | -2.5588 | -0.3939 |
| O          |     | 1.7575  | -1.1870 | -2.0656 |
| H          |     | 1.1566  | -1.7950 | -1.5711 |
| H          |     | 2.2401  | -0.7750 | -1.3198 |
| H          |     | -2.7681 | 0.3026  | 0.1923  |
| H          |     | -3.0562 | 1.3659  | -1.1790 |
| H          |     | 0.4623  | -1.0033 | 0.6402  |
| H          |     | -0.3447 | -1.6626 | -0.0844 |
| H          |     | 0.7496  | -3.0755 | 0.0136  |
| 2_OH_PreIm |     | C       | 1.3437  | -1.3548 |
|            | H   | 1.9341  | -1.6166 | 1.1926  |
|            | C   | 0.0731  | -0.6678 | 0.7633  |

|                                                            |   |         |         |         |
|------------------------------------------------------------|---|---------|---------|---------|
|                                                            | H | -0.5833 | -1.0782 | 1.5157  |
|                                                            | O | -1.3795 | -1.1676 | -0.6942 |
|                                                            | O | 1.0452  | -2.5316 | -0.4173 |
|                                                            | H | 1.8688  | -3.0252 | -0.4973 |
|                                                            | H | -1.8677 | -1.9232 | -0.3495 |
|                                                            | C | 1.1566  | 0.8818  | -0.5009 |
|                                                            | C | 1.9095  | 2.1766  | -0.2521 |
|                                                            | H | 2.6725  | 2.3202  | -1.0204 |
|                                                            | H | 1.2236  | 3.0252  | -0.2866 |
|                                                            | H | 2.3902  | 2.1530  | 0.7296  |
|                                                            | N | 0.1341  | 0.6167  | 0.5404  |
|                                                            | H | -0.8537 | 1.0753  | 0.4430  |
|                                                            | H | 0.6232  | 0.9391  | -1.4574 |
|                                                            | N | 2.0159  | -0.3076 | -0.4637 |
|                                                            | H | 2.9105  | -0.0808 | -0.0472 |
|                                                            | O | -2.3086 | 0.9835  | -0.0658 |
|                                                            | H | -2.3829 | 1.5296  | -0.8558 |
|                                                            | H | -1.9436 | -0.1985 | -0.4489 |
|                                                            | H | -1.6295 | -0.7803 | -1.5157 |
|                                                            | H | -1.0755 | 0.4806  | 0.1674  |
|                                                            | H | -2.9105 | 0.2723  | 0.0735  |
|                                                            | H | -2.0439 | -0.8434 | -0.6790 |
|                                                            | C | 0.7449  | 1.0839  | 0.3483  |
|                                                            | C | 0.7027  | 2.3147  | 1.2009  |
|                                                            | H | 1.4924  | 2.9838  | 0.8639  |
|                                                            | H | -0.2635 | 2.8143  | 1.1106  |
|                                                            | H | 0.8846  | 2.0495  | 2.2424  |
|                                                            | H | -0.5462 | -0.8832 | 1.4238  |
|                                                            | O | 0.6355  | -2.2833 | 0.3890  |
|                                                            | H | 1.4996  | -1.8798 | 0.1172  |
|                                                            | H | 0.8797  | -2.9838 | 1.0022  |
|                                                            | H | 1.3170  | 0.2242  | 0.6371  |
|                                                            | O | 2.8934  | 1.3861  | -0.3461 |
|                                                            | H | 2.6203  | 1.6226  | -1.2390 |
|                                                            | O | 3.0043  | -1.0923 | -0.2014 |
|                                                            | H | 3.0052  | -0.0210 | -0.3223 |
|                                                            | H | 3.5474  | -1.2438 | 0.5794  |
|                                                            | N | -0.9592 | -0.0155 | 1.0905  |
|                                                            | H | -1.5336 | 0.4538  | 1.7813  |
|                                                            | N | 0.2206  | 1.1372  | -0.9179 |
|                                                            | C | -1.6487 | -0.2054 | -0.1759 |
|                                                            | H | -1.6013 | -1.2652 | -0.4509 |
|                                                            | C | -0.8623 | 0.5674  | -1.2250 |
|                                                            | H | -1.2425 | 0.6064  | -2.2424 |
|                                                            | O | -2.9655 | 0.2955  | -0.1820 |
|                                                            | H | -3.5474 | -0.3732 | 0.1966  |
|                                                            | H | 2.4561  | 0.6880  | 0.1108  |
|                                                            | H | 2.2745  | -1.6590 | -0.3847 |
|                                                            | H | 2.3960  | -0.2965 | -0.5008 |
|                                                            | C | -0.5955 | 0.4607  | 0.7339  |
|                                                            | H | -1.3362 | 0.6566  | 1.4913  |
|                                                            | C | 0.3523  | 1.4123  | 0.1320  |
|                                                            | H | 0.3090  | 2.4882  | 0.2458  |
|                                                            | O | -2.2488 | 0.5883  | -0.6990 |
|                                                            | H | -2.9596 | 1.0657  | -0.2550 |
|                                                            | C | 0.9439  | -0.6163 | -0.5047 |
|                                                            | C | 2.1692  | -1.4294 | -0.0978 |
|                                                            | H | 1.9120  | -2.4882 | -0.0452 |
|                                                            | H | 2.9618  | -1.2929 | -0.8344 |
|                                                            | H | 2.5274  | -1.1008 | 0.8797  |
| 5_OH_PreIm (with the participation of two water molecules) |   |         |         |         |
| OH_PreIm_PreIm                                             |   |         |         |         |

|           |   |         |         |         |
|-----------|---|---------|---------|---------|
|           | N | 1.2270  | 0.8114  | -0.5828 |
|           | H | -2.9618 | -1.9219 | 0.5397  |
|           | H | 0.5860  | -0.9365 | -1.4913 |
|           | N | -0.1626 | -0.7454 | 0.4585  |
|           | H | -0.9718 | -1.4773 | 0.3314  |
|           | O | -2.3702 | -1.7803 | -0.2077 |
|           | H | -2.4276 | -0.5804 | -0.4924 |
|           | H | -2.3828 | -0.3004 | -0.9810 |
|           | H | -1.4497 | -1.7200 | -0.1063 |
|           | H | -2.4457 | -2.3189 | -0.9768 |
|           | H | -2.5942 | -1.1754 | -0.8039 |
| PreIm_2MI | C | 1.5645  | 0.8964  | -0.6909 |
|           | H | 2.4092  | 0.8003  | -1.3601 |
|           | C | 1.5549  | 1.1075  | 0.6886  |
|           | H | 2.3959  | 1.2250  | 1.3601  |
|           | O | 0.0183  | -1.7709 | 0.1709  |
|           | H | 0.4023  | -1.8373 | 1.0617  |
|           | C | -0.4670 | 0.8768  | 0.0157  |
|           | C | -1.9632 | 1.0332  | -0.0134 |
|           | H | -2.3945 | 0.4862  | -0.8546 |
|           | N | 0.2751  | 1.1012  | 1.1400  |
|           | H | -0.2023 | -0.7208 | -0.0283 |
|           | N | 0.2840  | 0.7562  | -1.1290 |
|           | H | 0.6732  | -2.0862 | -0.4743 |
|           | H | -2.2473 | 2.0862  | -0.1217 |
|           | H | -2.4092 | 0.6641  | 0.9128  |
